# Supplementary material for: Factors associated with disabling low back pain among nursing personnel at a medical centre in Japan: a comparative cross-sectional survey
Source: PubMed Central journal article supplement — BMJ Open. 2019 Sep 27;9(9):e032297. doi: 10.1136/bmjopen-2019-032297 (PMC6773308; doi:10.1136/bmjopen-2019-032297), 2019-09-27
Supplement: bmjopen-2019-032297.draft_revisions.pdf [file bmjopen-2019-032297.draft_revisions.pdf]

# BMJ Open

BMJ Open is committed to open peer review. As part of this commitment we make the peer review history of every article we publish publicly available.

When an article is published we post the peer reviewers' comments and the authors' responses online. We also post the versions of the paper that were used during peer review. These are the versions that the peer review comments apply to.

The versions of the paper that follow are the versions that were submitted during the peer review process. They are not the versions of record or the final published versions. They should not be cited or distributed as the published version of this manuscript.

BMJ Open is an open access journal and the full, final, typeset and author-corrected version of record of the manuscript is available on our site with no access controls, subscription charges or pay-per-view fees (<http://bmjopen.bmj.com>).

If you have any questions on BMJ Open's open peer review process please email [info.bmjopen@bmj.com](mailto:info.bmjopen@bmj.com)

# BMJ Open

## Factors associated with disabling low back pain among nursing personnel in Japan: a cross-sectional survey

|                               |                                                                                                                                                                                                                                                                                                                                                                                                                                                                                                                                        |
|-------------------------------|----------------------------------------------------------------------------------------------------------------------------------------------------------------------------------------------------------------------------------------------------------------------------------------------------------------------------------------------------------------------------------------------------------------------------------------------------------------------------------------------------------------------------------------|
| Journal:                      | <i>BMJ Open</i>                                                                                                                                                                                                                                                                                                                                                                                                                                                                                                                        |
| Manuscript ID                 | bmjopen-2019-032297                                                                                                                                                                                                                                                                                                                                                                                                                                                                                                                    |
| Article Type:                 | Research                                                                                                                                                                                                                                                                                                                                                                                                                                                                                                                               |
| Date Submitted by the Author: | 12-Jun-2019                                                                                                                                                                                                                                                                                                                                                                                                                                                                                                                            |
| Complete List of Authors:     | Yoshimoto, Takahiko; Showa University, Hygiene, Public Health and Preventive Medicine<br>Oka, Hiroyuki; The University of Tokyo, Department of Medical Research and Management for Musculoskeletal Pain<br>Ishikawa, Shuhei; Kameda Medical Center, Rehabilitation<br>Kokaze, Akatsuki; Showa University, Hygiene, Public Health and Preventive Medicine<br>Muranaga, Shingo; Kameda Medical Center, Rehabilitation<br>Matsudaira, Ko; The University of Tokyo, Department of Medical Research and Management for Musculoskeletal Pain |
| Keywords:                     | low back pain, nurse, kinesiophobia, sleep                                                                                                                                                                                                                                                                                                                                                                                                                                                                                             |
|                               |                                                                                                                                                                                                                                                                                                                                                                                                                                                                                                                                        |

SCHOLARONE™  
Manuscripts

1  
2  
3  
4  
5 **1 Title:**

6  
7 2 Factors associated with disabling low back pain among nursing personnel in Japan: A cross-  
8  
9 3 sectional survey.

10  
11  
12 4  
13  
14 5  
15  
16 6 Takahiko Yoshimoto<sup>1,2\*</sup>, Hiroyuki Oka<sup>2</sup>, Shuhei Ishikawa<sup>3</sup>, Akatsuki Kokaze<sup>1</sup>, Shingo Muranaga<sup>3</sup>,  
17  
18 7 Ko Matsudaira<sup>2</sup>

19  
20  
21  
22 9 <sup>1</sup> Department of Hygiene, Public Health and Preventive Medicine, Showa University School of  
23  
24 10 Medicine, Tokyo, Japan

25  
26 11 <sup>2</sup> Department of Medical Research and Management for Musculoskeletal Pain, 22nd Century  
27  
28 12 Medical & Research Center, Faculty of Medicine, The University of Tokyo, Tokyo, Japan

29  
30 13 <sup>3</sup> Department of Rehabilitation, Kameda Medical Center, Chiba, Japan

31  
32  
33  
34  
35 **15 \* Corresponding author:**

36  
37 16 Takahiko Yoshimoto

38  
39 17 Department of Hygiene, Public Health and Preventive Medicine, Showa University School of  
40  
41 18 Medicine, 1-5-8 Hatanodai, Shinagawa-ku, Tokyo 142-8555, Japan

42  
43 19 Tel: +81(3)3784-8134; Fax: +81(3)3784-7733

44  
45 20 E-mail address: yoshimotot@med.showa-u.ac.jp

46  
47  
48  
49 21  
50 22 **Word count:** 2,893 words

1  
2  
3  
4  
5 23 **ABSTRACT**  
6

7 24 **Objectives:** Low back pain (LBP) is a common cause of disability among nursing personnel.

8  
9 25 Although many studies regarding the risk factors for LBP among nursing staff have focused on  
10  
11 26 the physical load at work, multidimensional assessments of risk factors are essential to identify  
12  
13 27 appropriate preventive strategies. We aimed to investigate the association of multidimensional  
14  
15 28 factors (individual, physical, psychological, and occupational) with disabling LBP among nursing  
16  
17 29 personnel in Japan.

18  
19  
20 30 **Design:** Observational study with cross-sectional design.

21  
22 31 **Setting:** Data was collected using the self-administered questionnaire at a tertiary medical center.

23  
24 32 **Participants:** After excluding participants with missing variables, 718 nursing personnel were  
25  
26 33 included in the analysis.

27  
28 34 **Outcome measures:** A self-administered questionnaire assessed individual characteristics,  
29  
30 35 rotating night shift data, severity of LBP, previous episode of LBP, sleep problem, kinesiophobia  
31  
32 36 (Tampa Scale for Kinesiophobia), depressive condition (K6), physical flexibility, and frequency  
33  
34 37 of lifting at work. A logistic regression model was used to evaluate the factors associated with  
35  
36 38 disabling LBP (LBP interfering with work) among nursing personnel.

37  
38  
39 39 **Results:** Of all participants, 110 (15.3%) reported having disabling LBP. The multivariable  
40  
41 40 logistic regression analysis after adjustment for several confounding factors showed that  
42  
43 41 kinesiophobia (highest tertile, adjusted odds ratio [aOR]: 6.13, 95% confidence interval [CI]:  
44  
45 42 3.34-11.27), previous episode of LBP (aOR: 4.33, 95% CI: 1.50-12.41), and insomnia (aOR: 1.66,  
46  
47 43 95% CI: 1.05-2.62) were significantly associated with disabling LBP.

48  
49 44 **Conclusions:** The present study indicated that kinesiophobia, a previous episode of LBP, and  
50  
51 45 sleep problems were associated with disabling LBP among nursing personnel. In the future,  
52  
53 46 workplace interventions considering assessments of these factors may reduce the incidence of  
54  
55 47 disabling LBP in nursing staff, although further prospective studies are needed.  
56  
57  
58  
59  
60

1  
2  
3  
4  
5     **48     Strengths and limitations of this study**  
6

- 7     49     ➤     This study was designed to assess simultaneously the multidimensional aspects (individual,  
8             50             physical, psychological, and occupational) of disabling low back pain among nursing  
9             51             personnel in Japan.  
10     52     ➤     This paper provides results that will be useful in understanding the complexity of low back  
11             53             pain and developing appropriate strategies for reducing the incidence of occupational low  
12             54             back pain.  
13     55     ➤     The major limitations of this study are the participants at a single center and the cross-  
14             56             sectional design.
- 15  
16  
17  
18  
19  
20  
21  
22  
23  
24  
25  
26  
27  
28  
29  
30  
31  
32  
33  
34  
35  
36  
37  
38  
39  
40  
41  
42  
43  
44  
45  
46  
47  
48  
49  
50  
51  
52  
53  
54  
55  
56  
57  
58  
59  
60

## 57 INTRODUCTION

58 The global burden of disease study 2017 indicated that low back pain (LBP) is one of the  
59 leading cause of disability worldwide.<sup>1</sup> LBP is a major public health problem with an enormous  
60 negative economic impact on individuals, industries, and societies.<sup>2,3</sup>

61 The etiology of LBP is multifactorial and includes physical factors (physical load at work,<sup>4</sup>  
62 physical flexibility,<sup>5</sup> etc.) and psychological factors (depression,<sup>6</sup> and fear-avoidance belief,<sup>7</sup> etc.).  
63 Among psychological factors, pain-related fear of movement/reinjury, which is known as  
64 kinesiophobia, has been suggested to be an important contributor for LBP.<sup>8</sup> LBP also recurs  
65 frequently; thus, a previous episode of LBP can be a predictor of future episodes.<sup>9</sup> Moreover,  
66 lifestyle factors including sleep problems can increase the risk of LBP.<sup>10</sup>

67 Several studies have shown that nursing personnel have a higher prevalence of LBP relative to  
68 the general population,<sup>11</sup> or other occupational groups,<sup>12,13</sup> which may be related to nursing work-  
69 related factors. Indeed, in addition to the above physical and psychological factors, occupation-  
70 specific factors such as frequent manual handling<sup>14,15</sup> and rotating night shifts<sup>16</sup> have been  
71 suggested to be associated with the development of LBP among nursing personnel. Because LBP  
72 could lead not only to decreased work performance, but also professional abandonment,<sup>17</sup>  
73 clarifying the risk factors of LBP and exploring appropriate preventive strategies is essential to  
74 reduce the incidence of LBP among nursing professionals.

75 Although there is ample evidence showing that physical factors, including manual handling,  
76 among nursing personnel are a significant risk factor for LBP,<sup>14,15,17</sup> systematic reviews of  
77 interventions for LBP in nurses have indicated that ergonomic interventions for LBP had  
78 inadequate results.<sup>18,19</sup> Thus, studies investigating the factors associated with LBP among nursing  
79 personnel from a multidimensional perspective including individual, physical and psychological  
80 factors are increasingly needed. Since the prevalence of disabling LBP varies across countries  
81 and occupations,<sup>20</sup> it may be important to investigate the factors associated with disabling LBP  
82 among nursing personnel in Japan in order to design appropriate strategies for reducing the

1  
2  
3  
4  
5 83 incidence of occupational LBP. Therefore, we aimed to perform a multidimensional assessment,  
6  
7 84 including individual, physical, psychological, and occupational aspects, of disabling LBP among  
8  
9 85 nursing personnel at a tertiary hospital in Japan.  
10  
11  
12 86

## 13 14 87 **METHODS**

### 15 16 88 **Study populations**

17  
18 89 This cross-sectional study was based on a survey conducted among nursing personnel at  
19  
20 90 Kameda Medical Center at Chiba Prefecture, Japan during February 2017. During this period, an  
21  
22 91 anonymous, self-administered questionnaire was distributed to 1,152 workers at the nursing  
23  
24 92 department in the center. After the workers answered the questionnaires, they put them in sealed  
25  
26 93 envelopes. Then, occupational health staff collected and sent the envelopes to the authors. Staff  
27  
28 94 other than the authors were not allowed to open the sealed envelopes. Written informed consent  
29  
30 95 was obtained from each participant. All procedures were approved by the Research Ethics  
31  
32 96 Committee of Kameda Medical Center (Approval No. 16-159) and carried out according to the  
33  
34 97 Declaration of Helsinki.  
35  
36 98

### 37 38 39 99 **Study measures**

40  
41 100 The following items were assessed using the self-administered questionnaire: age, sex, height,  
42  
43 101 weight, occupation type (registered nurse, assistant nurse, midwife, or nursing aid), rotating night  
44  
45 102 shift (frequency of shift work per month), severity of LBP, previous episode of LBP, sleep  
46  
47 103 problem, fear-avoidance (kinesiophobia), depressive condition, physical flexibility, and lifting at  
48  
49 104 work. Body mass index (BMI) was calculated as weight (kg) divided by the square of height (m).  
50

51  
52 105 The severity of LBP, evaluated by respondents, was classified into four grades: grade 0 (no  
53  
54 106 LBP), grade 1 (LBP that did not interfere with work), grade 2 (LBP that interfered with work),  
55  
56 107 and grade 3 (LBP that interfered with work and required sick leave). These grades were  
57  
58 108 determined with reference to Von Korff's grading method.<sup>21</sup> The area of LBP (between the costal  
59  
60

1  
2  
3  
4  
5 109 margin and inferior gluteal folds) was indicated as a diagram in the questionnaire.<sup>22</sup> LBP was  
6  
7 110 defined as pain lasting for  $\geq 1$  day and experienced during the past one month, in accordance with  
8  
9 111 the standard definition of LBP proposed by Dionne et al.<sup>23</sup> LBP associated with menstrual periods,  
10  
11 112 pregnancy, or febrile illness was excluded. Individuals with disabling LBP were defined as those  
12  
13 113 who had LBP interfering with work, irrespective of sick leave because of LBP (grade 2 or 3).<sup>24</sup>  
14  
15 114 Past LBP history characteristics were evaluated in a question regarding the previous episode of  
16  
17 115 LBP.

18  
19  
20 116 Sleep problems were assessed using questions about the sleep duration and sleep habits in the  
21  
22 117 previous month.<sup>25</sup> Disability of sleep duration was defined by durations  $< 6$  hours. Difficulty  
23  
24 118 initiating sleep was defined as taking more than 30 min to fall asleep. Difficulty maintaining sleep  
25  
26 119 and early morning awakening were defined by the occurrence of nocturnal awakenings or early  
27  
28 120 morning awakenings three times or more per week. The presence of insomnia was defined if the  
29  
30 121 participants reported at least one positive response to the three symptoms of sleep habits above.<sup>25</sup>

31  
32  
33 122 To assess fear of movement/(re)injury, we used the short version of the Tampa Scale for  
34  
35 123 Kinesiophobia (TSK-11).<sup>26</sup> The TSK-11 consists of 11 items, each of which is scored on a 4-point  
36  
37 124 Likert scale ranging from 1 (strongly disagree) to 4 (strongly agree). The total scores range from  
38  
39 125 11 to 44, with higher scores indicating greater fear of movement/(re)injury. The Japanese version  
40  
41 126 of TSK-11 has been translated and validated by Matsudaira et al.<sup>27 28</sup> Participants' scores were  
42  
43 127 classified into tertiles according to their total scores.

44  
45 128 Depressive condition was evaluated by using the Kessler 6-item psychological distress scale  
46  
47 129 (K6).<sup>29</sup> The K6 consists of six items that assess how frequently respondents experienced  
48  
49 130 symptoms of psychological distress such as nervousness, negative affect, fatigue, and  
50  
51 131 worthlessness over the past 30 days. Each item was rated on a 5-point scale ranging from 0 (none  
52  
53 132 of the time) to 4 (all of the time), with the total score ranging from 0 to 24. The K6 has been  
54  
55 133 translated to a Japanese version, whose reliability and validity have been confirmed by Furukawa  
56  
57 134 et al.<sup>30</sup> Individuals with a K6 score of  $\geq 10$  were defined as having a depressive condition in



1  
2  
3  
4  
5 135 accordance with a previous study.<sup>31</sup>

6  
7 136 Physical flexibility was assessed by using the modified finger-to-floor distance<sup>32</sup> which mainly  
8  
9 137 represents trunk flexibility. The grade of this item was rated on a 7-point scale: 1) fingertips  
10  
11 138 cannot reach across the knees; 2) fingertips can reach across the knees but wrists not; 3) wrists  
12  
13 139 can reach beyond the knees, but fingertips cannot reach the ankles; 4) fingertips can reach the  
14  
15 140 ankles; 5) fingertips can touch the floor; 6) all of the fingers can touch the floor; and 7) palms can  
16  
17 141 touch the floor. Flexibility was classified into two groups based on whether wrists could reach  
18  
19 142 beyond the knee, but fingertips could not reach the ankles.<sup>24</sup>

20  
21  
22 143 Physical work demand was measured with a question exploring the frequency of lifting at work.  
23  
24 144 The frequency of lifting was divided into 0, 1-4, 5-9, 10 times per shift, and lifting  $\geq 5$  times per  
25  
26 145 shift was defined as frequent with reference to a previous study.<sup>16</sup>

27  
28  
29 146

### 30 31 147 **Statistical analysis**

32  
33 148 Data were presented as median (25th, 75th percentile) for continuous variables or number (%)  
34  
35 149 for categorical variables. Characteristics of participants were compared using the chi-squared test  
36  
37 150 for categorical variables and Wilcoxon rank-sum test for continuous variables. To assess factors  
38  
39 151 associated with disabling LBP, a logistic regression model was used to estimate the odds ratio  
40  
41 152 (OR) and 95% confidence interval (CI) for disabling LBP. In the model, the following factors  
42  
43 153 were included for adjustment: sex, age, BMI, frequency of shift work, sleep duration, insomnia,  
44  
45 154 previous episode of LBP, TSK and K6 scores, flexibility, lifting at work. Multicollinearity was  
46  
47 155 not suspected as all variance inflation factors (VIFs) were  $< 2$ . A p-value less than 0.05 was  
48  
49 156 considered to be statistically significant (two-sided). All statistical analyses were performed using  
50  
51 157 JMP version 13.0 (SAS Institute Inc., Cary, NC, USA).

52  
53  
54 158

## 55 56 159 **RESULTS**

57  
58 160 Of all workers at the nursing department in the center, 1075 respondents provided answers in  
59  
60

1  
2  
3  
4  
5 161 the questionnaires. Since the present study was focused on nursing personnel who provide direct  
6  
7 162 care in the center, 146 employees who were not related to direct nursing care (clerical work or  
8  
9 163 providing guidance to patients, etc.) were excluded. We further excluded 211 participants with  
10  
11 164 missing data for any variable. As a result, 718 nursing staff completed the questionnaire with no  
12  
13  
14 165 missing data and were included in the analysis.

15  
16 166 The median age of participants in the present study was 31.0 years, and 79.7% of the  
17  
18 167 participants were women. Of the included participants, 15.3% were reported to have disabling  
19  
20 168 LBP. The characteristics of participants with or without disabling LBP are shown in Table 1. The  
21  
22 169 proportions of insomnia ( $p < 0.001$ ) and previous episode of LBP ( $p < 0.001$ ) among participants  
23  
24 170 with disabling LBP were higher relative to those observed in participants without disabling LBP.  
25  
26 171 The proportions of those who had high TSK ( $p < 0.001$ ) or K6 ( $p < 0.038$ ) scores were higher in  
27  
28 172 the disabling LBP group than in the no disabling LBP group. In contrast, the groups with and  
29  
30 173 without disabling LBP showed no significant differences for physical flexibility and the frequency  
31  
32  
33 174 of lifting at work.

34  
35 175 We calculated the crude and adjusted ORs and their 95% CIs for disabling LBP (Table 2). The  
36  
37 176 non-adjusted analysis showed that insomnia, previous episode of LBP, and TSK and K6 scores  
38  
39 177 were significantly associated with disabling LBP. Multivariable analysis after adjusting for sex,  
40  
41 178 age, BMI, and all explanatory variables showed that insomnia (adjusted OR [aOR]: 1.66, 95%  
42  
43 179 CI: 1.05-2.62), a previous episode of LBP (aOR: 4.31, 95% CI: 1.50-12.41), and TSK score (aOR:  
44  
45 180 2.08, 95% CI: 1.11-3.89 in middle, aOR: 6.13, 95% CI: 3.34-11.27 in high) remained significantly  
46  
47  
48 181 associated with disabling LBP.

Table 1. Characteristics of the study participants

|                                    | Disabling LBP     | No disabling LBP  | <i>p</i> -value |
|------------------------------------|-------------------|-------------------|-----------------|
|                                    | (n = 110)         | (n = 608)         |                 |
| Sex (women)                        | 79 (71.8%)        | 493 (81.1%)       | 0.026           |
| Age, years                         | 27.5 (24.0, 40.0) | 31.0 (24.0, 42.0) | 0.052           |
| Body mass index, kg/m <sup>2</sup> | 21.6 (19.8, 23.3) | 21.2 (19.5, 23.9) | 0.793           |
| Occupation type                    |                   |                   |                 |
| Registered nurse                   | 88 (80.0%)        | 495 (81.4%)       | 0.886           |
| Assistant nurse (practical nurse)  | 2 (1.8%)          | 16 (2.6%)         |                 |
| Midwife                            | 4 (3.6%)          | 18 (3.0%)         |                 |
| Nursing aid                        | 16 (14.5%)        | 79 (13.0%)        |                 |
| Frequency of shift work, per month | 6.0 (2.5, 10.0)   | 6.0 (0.0, 10.8)   | 0.571           |
| Sleep duration                     |                   |                   |                 |
| >6 hours                           | 78 (70.9%)        | 436 (71.7%)       | 0.864           |
| <6 hours                           | 32 (29.1%)        | 172 (28.3%)       |                 |
| Insomnia                           |                   |                   |                 |
| Not have insomnia                  | 47 (42.7%)        | 366 (60.2%)       | < 0.001         |
| Have insomnia                      | 63 (57.3%)        | 242 (39.8%)       |                 |
| Previous episode of LBP            |                   |                   |                 |
| No                                 | 4 (3.6%)          | 97 (16.0%)        | < 0.001         |
| Yes                                | 106 (96.4%)       | 511 (84.0%)       |                 |
| TSK                                |                   |                   |                 |
| Low ( $\leq 17$ )                  | 18 (16.4%)        | 252 (41.4%)       | < 0.001         |
| Middle (18-23)                     | 32 (29.1%)        | 206 (33.9%)       |                 |
| High ( $\geq 24$ )                 | 60 (54.5%)        | 150 (24.7%)       |                 |
| K6                                 |                   |                   |                 |
| <10                                | 78 (70.9%)        | 485 (79.8%)       | 0.038           |
| $\geq 10$                          | 32 (29.1%)        | 123 (20.2%)       |                 |
| Flexibility                        |                   |                   |                 |
| Flexible                           | 75 (68.2%)        | 443 (72.9%)       | 0.314           |
| Not flexible                       | 35 (31.6%)        | 165 (27.1%)       |                 |
| Lifting                            |                   |                   |                 |
| Not frequent                       | 45 (40.9%)        | 289 (47.5%)       | 0.200           |
| Frequent                           | 65 (59.1%)        | 319 (52.5%)       |                 |

Data are presented as number (percentage) or median (25th, 75th percentile).

LBP, Low back pain; TSK, Tampa scale for kinesiophobia

182

Table 2. Association between disabling low back pain and independent variables from logistic

regression models

|                                    | Crude             |                 | Adjusted*         |                 |
|------------------------------------|-------------------|-----------------|-------------------|-----------------|
|                                    | OR (95% CI)       | <i>p</i> -value | OR (95% CI)       | <i>p</i> -value |
| Frequency of shift work, per month | 1.00 (0.97-1.04)  | 0.783           | 0.98 (0.94-1.02)  | 0.390           |
| Sleep duration                     |                   |                 |                   |                 |
| >6 hours                           | 1.00              |                 | 1.00              |                 |
| <6 hours                           | 1.04 (0.66-1.63)  | 0.864           | 1.12 (0.68-1.83)  | 0.659           |
| Insomnia                           |                   |                 |                   |                 |
| Not have insomnia                  | 1.00              |                 | 1.00              |                 |
| Have insomnia                      | 2.03 (1.34-3.06)  | < 0.001         | 1.66 (1.05-2.62)  | 0.029           |
| Previous episode of LBP            |                   |                 |                   |                 |
| No                                 | 1.00              |                 | 1.00              |                 |
| Yes                                | 5.03 (1.81-13.97) | 0.002           | 4.31 (1.50-12.41) | 0.007           |
| TSK                                |                   |                 |                   |                 |
| Low ( $\leq 17$ )                  | 1.00              |                 | 1.00              |                 |
| Middle (18-23)                     | 2.17 (1.19-3.99)  | 0.012           | 2.08 (1.11-3.89)  | 0.022           |
| High ( $\geq 24$ )                 | 5.60 (3.19-9.84)  | < 0.001         | 6.13 (3.34-11.27) | < 0.001         |
| K6                                 |                   |                 |                   |                 |
| <10                                | 1.00              |                 | 1.00              |                 |
| $\geq 10$                          | 1.62 (1.02-2.55)  | 0.039           | 1.06 (0.64-1.75)  | 0.834           |
| Flexibility                        |                   |                 |                   |                 |
| Flexible                           | 1.00              |                 | 1.00              |                 |
| Not flexible                       | 1.25 (0.81-1.94)  | 0.314           | 0.95 (0.59-1.53)  | 0.846           |
| Lifting                            |                   |                 |                   |                 |
| Not frequent                       | 1.00              |                 | 1.00              |                 |
| Frequent                           | 1.31 (0.87-1.98)  | 0.201           | 0.99 (0.62-1.58)  | 0.973           |

LBP, Low back pain; TSK, Tampa scale for kinesiophobia; OR, Odds ratio; CI, Confidence interval

\*Adjusted for sex, age, body mass index, and all other variables which indicated in this table.

183

184

## 185 DISCUSSION

186 The present study investigated the association of disabling LBP with related factors via a  
 187 multifaceted assessment among nursing personnel at a tertiary hospital. The results of our  
 188 multivariable logistic regression analysis showed that insomnia, previous episodes of LBP, and

1  
2  
3  
4  
5 189 kinesiophobia were independently associated with disabling LBP. To our knowledge, this is the  
6  
7 190 first study that identified a significant association of pain-related fear and insomnia with disabling  
8  
9 191 LBP among nursing personnel in Japan.

11 192 In this study, disabling LBP was set as the outcome of interest to identify risk factors for LBP  
12  
13 193 among nursing personnel. In occupational fields, absence from work (absenteeism) due to LBP is  
14  
15 194 often used as the outcome of disability. However, the number of individuals taking a sick leave  
16  
17 195 due to LBP is considerably small. A previous international epidemiological study showed that the  
18  
19 196 prevalence of absenteeism due to musculoskeletal disorders, mainly LBP, was much less common  
20  
21 197 in Japan relative to that in the UK.<sup>12</sup> Moreover, it has been suggested that the loss of work  
22  
23 198 performance due to LBP has a greater negative economic impact on individuals and workplaces  
24  
25 199 in terms of healthcare costs and work productivity than sick leaves due to LBP.<sup>33 34</sup> Therefore, it  
26  
27 200 may be appropriate to define disabling LBP as LBP interfering with work performance with or  
28  
29 201 without sick leave.

32 202 Our results showed that high TSK scores were significantly associated with disabling LBP  
33  
34 203 among nursing personnel after adjustment for various confounding factors (the OR [95% CI] of  
35  
36 204 the highest tertile of TSK: 6.13 [3.34-11.27]). This result was similar to those obtained in our  
37  
38 205 previous studies with white-collar workers<sup>31</sup> and workers at nursing care facilities,<sup>35</sup> which  
39  
40 206 implies that kinesiophobia is an important factor for LBP regardless of job type. Kinesiophobia,  
41  
42 207 an irrational and debilitating fear of movement/(re)injury, can cause a negative vicious cycle in  
43  
44 208 the fear-avoidance model.<sup>36</sup> Avoidance of behavior based on kinesiophobia can cause physical  
45  
46 209 inactivity, which has a negative impact on physical and psychological aspects and results in  
47  
48 210 persistence of LBP. Werti et al reported that fear-avoidance beliefs were an important prognostic  
49  
50 211 factor for LBP chronicity<sup>7</sup> and predicted poor treatment responses in subjects with LBP of less  
51  
52 212 than 6 months.<sup>37</sup> Moreover, a recent systematic review has indicated that a greater degree of  
53  
54 213 kinesiophobia at baseline predicted the progression of disability and the subsequent decline of  
55  
56 214 quality of life among subjects with chronic musculoskeletal pain.<sup>38</sup> Therefore, our results suggest

1  
2  
3  
4  
5 215 that assessment of negative beliefs such as kinesiophobia may help prevent the chronicity of LBP  
6  
7 216 in the workplace.

8  
9 217 We found that the presence of a previous episode of LBP was a significant factor associated  
10  
11 218 with disabling LBP, which is consistent with our earlier study in Japan.<sup>24</sup> Previous systematic  
12  
13 219 reviews also showed that individuals with a history of LBP were at increased risk of future  
14  
15 220 episodes.<sup>9 39</sup> Indeed, LBP has been suggested to be liable to recurrence. The recurrence rate of  
16  
17 221 LBP within the first year after the episode has been reported to range from 24% to 50% or more.<sup>39</sup>  
18  
19 222 <sup>40</sup> This may be because individuals with LBP sometimes reduce their levels of physical activity,  
20  
21 223 which leads to physical deconditioning, including functional changes of the trunk. A recent study  
22  
23 224 indicated that trunk muscle mass was associated with LBP disability.<sup>41</sup> Additionally, our results  
24  
25 225 may indicate that individuals with LBP continue to have the risk factors responsible for the initial  
26  
27 226 occurrence of LBP. Thus, a previous episode of LBP may be an important predictor of future  
28  
29 227 episodes also among nursing personnel.

30  
31  
32 228 In this study, sleep disturbance defined as insomnia was found to be an independent factor  
33  
34 229 relevant to disabling LBP among nursing personnel. Previous studies reported that more than 50%  
35  
36 230 of those who suffer from LBP have sleep problems.<sup>42 43</sup> Although the relationship between  
37  
38 231 disturbed sleep and pain has been considered to be bidirectional, recent studies have focused on  
39  
40 232 the influence of disturbed sleep on pain. Several prospective studies have indicated that sleep  
41  
42 233 problems were associated with a higher risk of chronic musculoskeletal pain onset including  
43  
44 234 LBP.<sup>10 44</sup> Our findings may be attributable to the decreased pain threshold consequent to sleep  
45  
46 235 disturbance, which has been indicated by experimental studies.<sup>45</sup> Although the mechanism  
47  
48 236 underlying the association between sleep disturbance and pain remains to be fully understood, the  
49  
50 237 mesolimbic dopamine system has been suggested to play a role via an overlapping  
51  
52 238 neurophysiological mechanism between sleep and pain;<sup>46</sup> however, because the potential  
53  
54 239 mechanisms involved in these interactions are beyond the scope of our study, further studies  
55  
56 240 including pathophysiological assessments are needed. Our results suggest that in the treatment of  
57  
58  
59  
60

1  
2  
3  
4  
5 241 individuals with disabling LBP, assessment and management of both sleep problems and LBP  
6  
7 242 may have more positive effects on recovery relative to those achieved by targeting sleep or LBP  
8  
9 243 independently.

11 244 The present study investigated the association of disabling LBP with multidimensional factors  
12  
13 245 among nursing personnel, including selective variables with reference to previous findings. These  
14  
15 246 factors were assessed using validated tools, which would reduce the risk of classification bias.  
16  
17 247 However, the study had some limitations. First, participants were recruited from a single hospital,  
18  
19 248 which might limit the generalizability of our results. Second, due to the cross-sectional design,  
20  
21 249 the causality of the associations cannot be determined. Finally, our results might be affected by  
22  
23 250 some potential confounding factors such as psychosocial work-related stress, other lifestyle habits,  
24  
25 251 or socioeconomic status that were not considered in our study.

28 252 In conclusion, the present findings obtained with a multivariable logistic regression analysis  
29  
30 253 showed that kinesiophobia, previous episodes of LBP, and insomnia were significantly associated  
31  
32 254 with disabling LBP among nursing personnel. In the future, workplace interventions considering  
33  
34 255 the assessment of these factors can help reduce the incidence of disabling LBP among nursing  
35  
36 256 staff, although further prospective studies are needed to elucidate a causal relationship.

37  
38  
39 257

#### 41 258 **Acknowledgements**

42  
43 259 We would like to thank Mrs. Noriko Maruyama, Mrs. Tsuyako Takanashi, Mrs. Kyoko  
44  
45 260 Yamamoto, and all participants at the nursing department in Kameda Medical Center for  
46  
47 261 supporting the study.

48  
49  
50 262

#### 51 263 **Funding sources:**

52  
53 264 This study was supported by a grant from Industrial Disease Clinical Research Grants (No.  
54  
55 265 14020301). The funder had no role in study design, data collection and analysis, decision to  
56  
57 266 publish, or preparation of the manuscript.

1  
2  
3  
4  
5 267  
6

7 268 **Competing interests:**

9 269 KM reports grants from the Ministry of Health, Labor and Welfare during the conduct of the  
11 270 study; grants and personal fees from AYUMI Pharmaceutical Corporation, Nippon Zoki  
13 271 Pharmaceutical Co., Ltd., Ono Pharmaceutical Co., Ltd, Shionogi & Co., Ltd., Eli Lilly Japan,  
15 272 Astellas Pharma Inc., Toto Ltd., Eisai Co., Ltd., Teijin Pharma Limited, Japan Inc., and Hisamitsu  
17 273 Pharmaceutical Co., Inc.; personal fees from Pfizer Inc., Janssen Pharmaceutical K.K., Kaken  
19 274 Pharmaceutical Co., Ltd., Mochida Pharmaceutical Co., Ltd., and Daiichi Sankyo Company,  
21 275 Limited; grants from Sompo Holdings, Inc., MTG, NuVasive Japan , and Murata Manufacturing  
23 276 Co., Ltd.; grants from Okamura Corporation; and non-financial support from Trunk Solution Co.,  
25 277 Ltd. outside the submitted work. The other authors report no conflicts of interest in this work.

28  
29 278

30 279 **Authors' contributions**

32 280 TY and KM contributed to the conceptualization of this study. TY and SI contributed to the data  
34 281 acquisition. TY and HO analyzed and interpreted the data. SM, AK, and KM contributed to the  
36 282 supervision of this study. TY drafted the manuscript. All authors have read and approved the final  
38 283 manuscript.

40  
41 284

43 285 **References**

- 45 286 1. GBD 2017 Disease and Injury Incidence and Prevalence Collaborators. Global, regional, and  
47 287 national incidence, prevalence, and years lived with disability for 354 diseases and injuries  
49 288 for 195 countries and territories, 1990-2017: a systematic analysis for the Global Burden of  
51 289 Disease Study 2017. *Lancet* 2018;392:1789–858.
- 53 290 2. Dagenais S, Caro J, Haldeman S. A systematic review of low back pain cost of illness studies  
55 291 in the United States and internationally. *Spine J* 2008;8:8–20.
- 57 292 3. Dieleman JL, Baral R, Birger M, et al. US Spending on Personal Health Care and Public



- 1  
2  
3  
4  
5 293 Health, 1996-2013. *JAMA* 2016;316:2627–46.  
6  
7 294 4. Hoogendoorn WE, van Poppel MN, Bongers PM, et al. Physical load during work and leisure  
8  
9 295 time as risk factors for back pain. *Scand J Work Environ Health* 1999;25:387–403.  
10  
11 296 5. Sadler SG, Spink MJ, Ho A, et al. Restriction in lateral bending range of motion, lumbar  
12  
13 297 lordosis, and hamstring flexibility predicts the development of low back pain: a systematic  
14  
15 298 review of prospective cohort studies. *BMC Musculoskelet Disord* 2017;18:179.  
16  
17 299 6. Pinheiro MB, Ferreira ML, Refshauge K, et al. Symptoms of Depression and Risk of New  
18  
19 300 Episodes of Low Back Pain: A Systematic Review and Meta-Analysis. *Arthritis Care Res*  
20  
21 301 *(Hoboken)* 2015;67:1591–603.  
22  
23 302 7. Wertli MM, Rasmussen-Barr E, Weiser S, et al. The role of fear avoidance beliefs as a  
24  
25 303 prognostic factor for outcome in patients with nonspecific low back pain: a systematic review.  
26  
27 304 *Spine J* 2014;14:816–36 e4.  
28  
29 305 8. Crombez G, Vlaeyen JW, Heuts PH, et al. Pain-related fear is more disabling than pain itself:  
30  
31 306 evidence on the role of pain-related fear in chronic back pain disability. *Pain* 1999;80:329–  
32  
33 307 39.  
34  
35 308 9. Taylor JB, Goode AP, George SZ, et al. Incidence and risk factors for first-time incident low  
36  
37 309 back pain: a systematic review and meta-analysis. *Spine J* 2014;14:2299–319.  
38  
39 310 10. Mork PJ, Vik KL, Moe B, et al. Sleep problems, exercise and obesity and risk of chronic  
40  
41 311 musculoskeletal pain: the Norwegian HUNT study. *Eur J Public Health* 2014;24:924–9.  
42  
43 312 11. Leighton DJ, Reilly T. Epidemiological aspects of back pain: the incidence and prevalence of  
44  
45 313 back pain in nurses compared to the general population. *Occup Med (Lond)* 1995;45:263–7.  
46  
47 314 12. Matsudaira K, Palmer KT, Reading I, et al. Prevalence and correlates of regional pain and  
48  
49 315 associated disability in Japanese workers. *Occup Environ Med* 2011;68:191–6.  
50  
51 316 13. Hofmann F, Stossel U, Michaelis M, et al. Low back pain and lumbago-sciatica in nurses and  
52  
53 317 a reference group of clerks: results of a comparative prevalence study in Germany. *Int Arch*  
54  
55 318 *Occup Environ Health* 2002;75:484–90.  
56  
57  
58  
59  
60

- 1  
2  
3  
4  
5 319 14. Smedley J, Egger P, Cooper C, et al. Prospective cohort study of predictors of incident low  
6  
7 320 back pain in nurses. *BMJ* 1997;314:1225–8.  
8  
9 321 15. Yassi A, Lockhart K. Work-relatedness of low back pain in nursing personnel: a systematic  
10  
11 322 review. *Int J Occup Environ Health* 2013;19:223–44.  
12  
13 323 16. Eriksen W, Bruusgaard D, Knardahl S. Work factors as predictors of intense or disabling low  
14  
15 324 back pain; a prospective study of nurses' aides. *Occup Environ Med* 2004;61:398–404.  
16  
17 325 17. Schlossmacher R, Amaral FG. Low back injuries related to nursing professionals working  
18  
19 326 conditions: a systematic review. *Work* 2012;41 Suppl 1:5737–8.  
20  
21 327 18. Dawson AP, McLennan SN, Schiller SD, et al. Interventions to prevent back pain and back  
22  
23 328 injury in nurses: a systematic review. *Occup Environ Med* 2007;64:642–50.  
24  
25 329 19. Van Hoof W, O'Sullivan K, O'Keeffe M, et al. The efficacy of interventions for low back pain  
26  
27 330 in nurses: A systematic review. *Int J Nurs Stud* 2018;77:222–31.  
28  
29 331 20. Coggon D, Ntani G, Palmer KT, et al. Drivers of international variation in prevalence of  
30  
31 332 disabling low back pain: Findings from the Cultural and Psychosocial Influences on  
32  
33 333 Disability study. *Eur J Pain* 2019;23:35–45.  
34  
35 334 21. Von Korff M, Ormel J, Keefe FJ, et al. Grading the severity of chronic pain. *Pain*  
36  
37 335 1992;50:133–49.  
38  
39 336 22. Kuorinka I, Jonsson B, Kilbom A, et al. Standardised Nordic questionnaires for the analysis  
40  
41 337 of musculoskeletal symptoms. *Appl Ergon* 1987;18:233–7.  
42  
43 338 23. Dionne CE, Dunn KM, Croft PR, et al. A consensus approach toward the standardization of  
44  
45 339 back pain definitions for use in prevalence studies. *Spine (Phila Pa 1976)* 2008;33:95–103.  
46  
47 340 24. Matsudaira K, Konishi H, Miyoshi K, et al. Potential risk factors for new onset of back pain  
48  
49 341 disability in Japanese workers: findings from the Japan epidemiological research of  
50  
51 342 occupation-related back pain study. *Spine (Phila Pa 1976)* 2012;37:1324–33.  
52  
53 343 25. Nakata A, Ikeda T, Takahashi M, et al. Sleep-related risk of occupational injuries in Japanese  
54  
55 344 small and medium-scale enterprises. *Ind Health* 2005;43:89–97.  
56  
57  
58  
59  
60

- 1  
2  
3  
4  
5 345 26. Woby SR, Roach NK, Urmston M, et al. Psychometric properties of the TSK-11: a shortened  
6 346 version of the Tampa Scale for Kinesiophobia. *Pain* 2005;117:137–44.
- 7  
8  
9 347 27. Kikuchi N, Matsudaira K, Sawada T, et al. Psychometric properties of the Japanese version  
10 348 of the Tampa Scale for Kinesiophobia (TSK-J) in patients with whiplash neck injury pain  
11 and/or low back pain. *J Orthop Sci* 2015;20:985–92.
- 12  
13  
14 349  
15  
16 350 28. Matsudaira K, Inuzuka K, Kikuchi N, et al. Development of a Japanese Version of the Tampa  
17 351 Scale for Kinesiophobia (TSK-J): Translation and Linguistic Validation. *Rinsho Seikei Geka*  
18 352 (*Clin Orthop Surg*) 2013;48:13–9.
- 19  
20  
21  
22 353 29. Kessler RC, Andrews G, Colpe LJ, et al. Short screening scales to monitor population  
23 354 prevalences and trends in non-specific psychological distress. *Psychol Med* 2002;32:959–76.
- 24  
25  
26 355 30. Furukawa TA, Kawakami N, Saitoh M, et al. The performance of the Japanese version of the  
27 356 K6 and K10 in the World Mental Health Survey Japan. *Int J Methods Psychiatr Res*  
28 357 2008;17:152–8.
- 29  
30  
31  
32 358 31. Wakaizumi K, Yamada K, Oka H, et al. Fear-avoidance beliefs are independently associated  
33 359 with the prevalence of chronic pain in Japanese workers. *J Anesth* 2017;31:255–62.
- 34  
35  
36 360 32. Akaha H, Matsudaira K, Takeshita K, et al. Modified measurement of finger-floor distance -  
37 361 self-assessment bending scale-. *J Jpn Soci Lumbar Spine Disord* 2008;14:164–9.
- 38  
39  
40 362 33. Loeppke R, Taitel M, Richling D, et al. Health and productivity as a business strategy. *J Occup*  
41 363 *Environ Med* 2007;49:712–21.
- 42  
43  
44 364 34. Wada K, Arakida M, Watanabe R, et al. The economic impact of loss of performance due to  
45 365 absenteeism and presenteeism caused by depressive symptoms and comorbid health  
46 conditions among Japanese workers. *Ind Health* 2013;51:482–9.
- 47  
48  
49 366  
50 367 35. Yoshimoto T, Oka H, Fujii K, et al. Survey on chronic disabling low back pain among care  
51 368 workers at nursing care facilities: a multicenter collaborative cross-sectional study. *J Pain*  
52 369 *Res* 2019;12:1025–32.
- 53  
54  
55  
56 370 36. Leeuw M, Goossens ME, Linton SJ, et al. The fear-avoidance model of musculoskeletal pain:

- 1  
2  
3  
4  
5 371 current state of scientific evidence. *J Behav Med* 2007;30:77–94.  
6  
7 372 37. Wertli MM, Rasmussen-Barr E, Held U, et al. Fear-avoidance beliefs-a moderator of  
8  
9 373 treatment efficacy in patients with low back pain: a systematic review. *Spine J*  
10  
11 374 2014;14:2658–78.  
12  
13 375 38. Luque-Suarez A, Martinez-Calderon J, Falla D. Role of kinesiophobia on pain, disability and  
14  
15 376 quality of life in people suffering from chronic musculoskeletal pain: a systematic review.  
16  
17 377 *Br J Sports Med* 2019;53:554–9.  
18  
19 378 39. Hestbaek L, Leboeuf-Yde C, Manniche C. Low back pain: what is the long-term course? A  
20  
21 379 review of studies of general patient populations. *Eur Spine J* 2003;12:149–65.  
22  
23 380 40. Stanton TR, Henschke N, Maher CG, et al. After an episode of acute low back pain, recurrence  
24  
25 381 is unpredictable and not as common as previously thought. *Spine (Phila Pa 1976)*  
26  
27 382 2008;33:2923–8.  
28  
29 383 41. Hori Y, Hoshino M, Inage K, et al. ISSLS PRIZE IN CLINICAL SCIENCE 2019: clinical  
30  
31 384 importance of trunk muscle mass for low back pain, spinal balance, and quality of life-a  
32  
33 385 multicenter cross-sectional study. *Eur Spine J* 2019;28:914–21.  
34  
35 386 42. Hagen EM, Svensen E, Eriksen HR, et al. Comorbid subjective health complaints in low back  
36  
37 387 pain. *Spine (Phila Pa 1976)* 2006;31:1491–5.  
38  
39 388 43. Alsaadi SM, McAuley JH, Hush JM, et al. Prevalence of sleep disturbance in patients with  
40  
41 389 low back pain. *Eur Spine J* 2011;20:737–43.  
42  
43 390 44. Canivet C, Ostergren PO, Choi B, et al. Sleeping problems as a risk factor for subsequent  
44  
45 391 musculoskeletal pain and the role of job strain: results from a one-year follow-up of the  
46  
47 392 Malmo Shoulder Neck Study Cohort. *Int J Behav Med* 2008;15:254–62.  
48  
49 393 45. Kundermann B, Krieg JC, Schreiber W, et al. The effect of sleep deprivation on pain. *Pain*  
50  
51 394 *Res Manag* 2004;9:25–32.  
52  
53 395 46. Finan PH, Smith MT. The comorbidity of insomnia, chronic pain, and depression: dopamine  
54  
55 396 as a putative mechanism. *Sleep Med Rev* 2013;17:173–83.  
56  
57  
58  
59  
60

STROBE Statement—Checklist of items that should be included in reports of *cross-sectional studies*

|                              | Item No | Recommendation                                                                                                                                                                                               | Page No |
|------------------------------|---------|--------------------------------------------------------------------------------------------------------------------------------------------------------------------------------------------------------------|---------|
| <b>Title and abstract</b>    | 1       | (a) Indicate the study's design with a commonly used term in the title or the abstract                                                                                                                       | P 1     |
|                              |         | (b) Provide in the abstract an informative and balanced summary of what was done and what was found                                                                                                          | P 2     |
| <b>Introduction</b>          |         |                                                                                                                                                                                                              |         |
| Background/rationale         | 2       | Explain the scientific background and rationale for the investigation being reported                                                                                                                         | P 4     |
| Objectives                   | 3       | State specific objectives, including any prespecified hypotheses                                                                                                                                             | P 4-5   |
| <b>Methods</b>               |         |                                                                                                                                                                                                              |         |
| Study design                 | 4       | Present key elements of study design early in the paper                                                                                                                                                      | P 5     |
| Setting                      | 5       | Describe the setting, locations, and relevant dates, including periods of recruitment, exposure, follow-up, and data collection                                                                              | P 5     |
| Participants                 | 6       | (a) Give the eligibility criteria, and the sources and methods of selection of participants                                                                                                                  | P 5     |
| Variables                    | 7       | Clearly define all outcomes, exposures, predictors, potential confounders, and effect modifiers. Give diagnostic criteria, if applicable                                                                     | P 5-7   |
| Data sources/<br>measurement | 8*      | For each variable of interest, give sources of data and details of methods of assessment (measurement). Describe comparability of assessment methods if there is more than one group                         | P 5-7   |
| Bias                         | 9       | Describe any efforts to address potential sources of bias                                                                                                                                                    | P 13    |
| Study size                   | 10      | Explain how the study size was arrived at                                                                                                                                                                    | NA      |
| Quantitative variables       | 11      | Explain how quantitative variables were handled in the analyses. If applicable, describe which groupings were chosen and why                                                                                 | P 5-7   |
| Statistical methods          | 12      | (a) Describe all statistical methods, including those used to control for confounding                                                                                                                        | P 7     |
|                              |         | (b) Describe any methods used to examine subgroups and interactions                                                                                                                                          | P 7     |
|                              |         | (c) Explain how missing data were addressed                                                                                                                                                                  | P 7     |
|                              |         | (d) If applicable, describe analytical methods taking account of sampling strategy                                                                                                                           | NA      |
|                              |         | (e) Describe any sensitivity analyses                                                                                                                                                                        | NA      |
| <b>Results</b>               |         |                                                                                                                                                                                                              |         |
| Participants                 | 13*     | (a) Report numbers of individuals at each stage of study—eg numbers potentially eligible, examined for eligibility, confirmed eligible, included in the study, completing follow-up, and analysed            | P 7-8   |
|                              |         | (b) Give reasons for non-participation at each stage                                                                                                                                                         | P 8     |
|                              |         | (c) Consider use of a flow diagram                                                                                                                                                                           | NA      |
| Descriptive data             | 14*     | (a) Give characteristics of study participants (eg demographic, clinical, social) and information on exposures and potential confounders                                                                     | P 7-9   |
|                              |         | (b) Indicate number of participants with missing data for each variable of interest                                                                                                                          | NA      |
| Outcome data                 | 15*     | Report numbers of outcome events or summary measures                                                                                                                                                         | P 8     |
| Main results                 | 16      | (a) Give unadjusted estimates and, if applicable, confounder-adjusted estimates and their precision (eg, 95% confidence interval). Make clear which confounders were adjusted for and why they were included | P 8, 10 |

|                          |    |                                                                                                                                                                            |         |
|--------------------------|----|----------------------------------------------------------------------------------------------------------------------------------------------------------------------------|---------|
|                          |    | (b) Report category boundaries when continuous variables were categorized                                                                                                  | P 9-10  |
|                          |    | (c) If relevant, consider translating estimates of relative risk into absolute risk for a meaningful time period                                                           | NA      |
| Other analyses           | 17 | Report other analyses done—eg analyses of subgroups and interactions, and sensitivity analyses                                                                             | NA      |
| <b>Discussion</b>        |    |                                                                                                                                                                            |         |
| Key results              | 18 | Summarise key results with reference to study objectives                                                                                                                   | P 10-11 |
| Limitations              | 19 | Discuss limitations of the study, taking into account sources of potential bias or imprecision. Discuss both direction and magnitude of any potential bias                 | P 13    |
| Interpretation           | 20 | Give a cautious overall interpretation of results considering objectives, limitations, multiplicity of analyses, results from similar studies, and other relevant evidence | P 11-13 |
| Generalisability         | 21 | Discuss the generalisability (external validity) of the study results                                                                                                      | P 13    |
| <b>Other information</b> |    |                                                                                                                                                                            |         |
| Funding                  | 22 | Give the source of funding and the role of the funders for the present study and, if applicable, for the original study on which the present article is based              | P 13    |

\*Give information separately for exposed and unexposed groups.

**Note:** An Explanation and Elaboration article discusses each checklist item and gives methodological background and published examples of transparent reporting. The STROBE checklist is best used in conjunction with this article (freely available on the Web sites of PLoS Medicine at <http://www.plosmedicine.org/>, Annals of Internal Medicine at <http://www.annals.org/>, and Epidemiology at <http://www.epidem.com/>). Information on the STROBE Initiative is available at [www.strobe-statement.org](http://www.strobe-statement.org).

# BMJ Open

## Factors associated with disabling low back pain among nursing personnel at a medical center in Japan: A comparative cross-sectional survey

|                                 |                                                                                                                                                                                                                                                                                                                                                                                                                                                                                                                                        |
|---------------------------------|----------------------------------------------------------------------------------------------------------------------------------------------------------------------------------------------------------------------------------------------------------------------------------------------------------------------------------------------------------------------------------------------------------------------------------------------------------------------------------------------------------------------------------------|
| Journal:                        | <i>BMJ Open</i>                                                                                                                                                                                                                                                                                                                                                                                                                                                                                                                        |
| Manuscript ID                   | bmjopen-2019-032297.R1                                                                                                                                                                                                                                                                                                                                                                                                                                                                                                                 |
| Article Type:                   | Original research                                                                                                                                                                                                                                                                                                                                                                                                                                                                                                                      |
| Date Submitted by the Author:   | 20-Aug-2019                                                                                                                                                                                                                                                                                                                                                                                                                                                                                                                            |
| Complete List of Authors:       | Yoshimoto, Takahiko; Showa University, Hygiene, Public Health and Preventive Medicine<br>Oka, Hiroyuki; The University of Tokyo, Department of Medical Research and Management for Musculoskeletal Pain<br>Ishikawa, Shuhei; Kameda Medical Center, Rehabilitation<br>Kokaze, Akatsuki; Showa University, Hygiene, Public Health and Preventive Medicine<br>Muranaga, Shingo; Kameda Medical Center, Rehabilitation<br>Matsudaira, Ko; The University of Tokyo, Department of Medical Research and Management for Musculoskeletal Pain |
| <b>Primary Subject Heading</b>: | Occupational and environmental medicine                                                                                                                                                                                                                                                                                                                                                                                                                                                                                                |
| Secondary Subject Heading:      | Epidemiology, Nursing                                                                                                                                                                                                                                                                                                                                                                                                                                                                                                                  |
| Keywords:                       | low back pain, nurse, kinesiophobia, sleep                                                                                                                                                                                                                                                                                                                                                                                                                                                                                             |
|                                 |                                                                                                                                                                                                                                                                                                                                                                                                                                                                                                                                        |

SCHOLARONE™  
Manuscripts

1  
2  
3  
4  
5  
6  
7  
8  
9  
10  
11  
12  
13  
14  
15  
16  
17  
18  
19  
20  
21  
22  
23  
24  
25  
26  
27  
28  
29  
30  
31  
32  
33  
34  
35  
36  
37  
38  
39  
40  
41  
42  
43  
44  
45  
46  
47  
48  
49  
50  
51  
52  
53  
54  
55  
56  
57  
58  
59  
60

1 **Title:**

2 Factors associated with disabling low back pain among nursing personnel at a medical center in  
3 Japan: A comparative cross-sectional survey.

4  
5  
6 Takahiko Yoshimoto<sup>1,2\*</sup>, Hiroyuki Oka<sup>2</sup>, Shuhei Ishikawa<sup>3</sup>, Akatsuki Kokaze<sup>1</sup>, Shingo Muranaga<sup>3</sup>,  
7 Ko Matsudaira<sup>2</sup>

8  
9 <sup>1</sup> Department of Hygiene, Public Health and Preventive Medicine, Showa University School of  
10 Medicine, Tokyo, Japan

11 <sup>2</sup> Department of Medical Research and Management for Musculoskeletal Pain, 22nd Century  
12 Medical & Research Center, Faculty of Medicine, The University of Tokyo, Tokyo, Japan

13 <sup>3</sup> Department of Rehabilitation, Kameda Medical Center, Chiba, Japan

14  
15 **\* Corresponding author:**

16 Takahiko Yoshimoto

17 Department of Hygiene, Public Health and Preventive Medicine, Showa University School of  
18 Medicine, 1-5-8 Hatanodai, Shinagawa-ku, Tokyo 142-8555, Japan

19 Tel: +81(3)3784-8134; Fax: +81(3)3784-7733

20 E-mail address: yoshimotota@gmail.com

21  
22 **Word count:** 3,229 words



1  
2  
3  
4  
5 23 **ABSTRACT**  
6

7 24 **Objectives:** Low back pain (LBP) is a common cause of disability among nursing personnel.

8  
9 25 Although many studies regarding the risk factors for LBP among nursing staff have focused on  
10  
11 26 the physical load at work, multidimensional assessments of risk factors are essential to identify  
12  
13 27 appropriate preventive strategies. We aimed to investigate the association of multidimensional  
14  
15 28 factors (individual, physical, psychological, and occupational) with disabling LBP among nursing  
16  
17 29 personnel in Japan.

18  
19  
20 30 **Design:** Observational study with comparative cross-sectional design.

21  
22 31 **Setting:** Data was collected using the self-administered questionnaire at a tertiary medical center.

23  
24 32 **Participants:** After excluding participants with missing variables, 718 nursing personnel were  
25  
26 33 included in the analysis.

27  
28 34 **Outcome measures:** A self-administered questionnaire assessed individual characteristics,  
29  
30 35 rotating night shift data, severity of LBP, previous episode of LBP, sleep problem, kinesiophobia  
31  
32 36 (Tampa Scale for Kinesiophobia), depressive condition (K6), physical flexibility, and frequency  
33  
34 37 of lifting at work. A logistic regression model was used to evaluate the factors associated with  
35  
36 38 disabling LBP (LBP interfering with work) among nursing personnel.

37  
38  
39 39 **Results:** Of all participants, 110 (15.3%) reported having disabling LBP. The multivariable  
40  
41 40 logistic regression analysis after adjustment for several confounding factors showed that  
42  
43 41 kinesiophobia (highest tertile, adjusted odds ratio [aOR]: 6.13, 95% confidence interval [CI]:  
44  
45 42 3.34-11.27), previous episode of LBP (aOR: 4.33, 95% CI: 1.50-12.41), and insomnia (aOR: 1.66,  
46  
47 43 95% CI: 1.05-2.62) were significantly associated with disabling LBP.

48  
49 44 **Conclusions:** The present study indicated that kinesiophobia, a previous episode of LBP, and  
50  
51 45 sleep problems were associated with disabling LBP among nursing personnel. In the future,  
52  
53 46 workplace interventions considering assessments of these factors may reduce the incidence of  
54  
55 47 disabling LBP in nursing staff, although further prospective studies are needed.

56  
57  
58 48  
59  
60

1  
2  
3  
4  
5  
6  
7  
8  
9  
10  
11  
12  
13  
14  
15  
16  
17  
18  
19  
20  
21  
22  
23  
24  
25  
26  
27  
28  
29  
30  
31  
32  
33  
34  
35  
36  
37  
38  
39  
40  
41  
42  
43  
44  
45  
46  
47  
48  
49 **Strengths and limitations of this study**

- 50 ➤ This study focused on disabling low back pain as the outcome of interest which was  
51 considered as a serious problem in workplace.
- 52 ➤ This study was designed to assess simultaneously the multidimensional aspects (individual,  
53 physical, psychological, and occupational) of disabling low back pain among nursing  
54 personnel in Japan.
- 55 ➤ This paper provides results that will be useful in understanding the complexity of low back  
56 pain and developing appropriate strategies for reducing the incidence of occupational low  
57 back pain.
- 58 ➤ This study was conducted among participants at one medical center, which might limit the  
59 generalizability of our findings.
- 60 ➤ The cross-sectional design of this study could not clarify a causal relationship.

## 61 INTRODUCTION

62 The global burden of disease study 2017 indicated that low back pain (LBP) is one of the  
63 leading cause of disability worldwide.<sup>1</sup> LBP is a major public health problem with an enormous  
64 negative economic impact on individuals, industries, and societies.<sup>2,3</sup>

65 The etiology of LBP is multifactorial and includes physical factors (physical load at work,<sup>4</sup>  
66 physical flexibility,<sup>5</sup> etc.) and psychological factors (depression,<sup>6</sup> and fear-avoidance belief,<sup>7</sup> etc.).  
67 Among psychological factors, pain-related fear of movement/reinjury, which is known as  
68 kinesiophobia, has been suggested to be an important contributor for LBP.<sup>8</sup> LBP also recurs  
69 frequently; thus, a previous episode of LBP can be a predictor of future episodes.<sup>9</sup> Moreover,  
70 lifestyle factors including sleep problems can increase the risk of LBP.<sup>10</sup>

71 Several studies have shown that nursing personnel have a higher prevalence of LBP relative to  
72 the general population or other occupational groups,<sup>11-13</sup> which may be related to nursing work-  
73 related factors. Indeed, in addition to the above physical and psychological factors, occupation-  
74 specific factors such as manual handling<sup>14,15</sup> and rotating night shifts<sup>16,17</sup> have been suggested to  
75 be associated with the development of LBP among nursing personnel. Because LBP could lead  
76 not only to decreased work performance, but also professional abandonment,<sup>18</sup> clarifying the risk  
77 factors of LBP and exploring appropriate preventive strategies is essential to reduce the incidence  
78 of LBP among nursing professionals.

79 Although there is ample evidence showing that physical factors, including manual handling,  
80 among nursing personnel are a significant risk factor for LBP,<sup>14,15,18</sup> systematic reviews of  
81 interventions for LBP in nurses have indicated that ergonomic interventions for LBP had  
82 inadequate results.<sup>19,20</sup> Thus, studies investigating the factors associated with LBP among nursing  
83 personnel from a multidimensional perspective including individual, physical and psychological  
84 factors are increasingly needed. Since the prevalence of disabling LBP varies across countries  
85 and occupations,<sup>21</sup> it may be important to investigate the factors associated with disabling LBP  
86 among nursing personnel in Japan in order to design appropriate strategies for reducing the

1  
2  
3  
4  
5 87 incidence of occupational LBP. Therefore, we aimed to perform a multidimensional assessment,  
6  
7 88 including individual, physical, psychological, and occupational aspects, of disabling LBP among  
8  
9 89 nursing personnel at a tertiary hospital in Japan.  
10

11 90

## 14 91 **METHODS**

### 16 92 **Study populations**

18 93 This comparative cross-sectional study was based on a survey conducted among nursing  
19  
20 94 personnel at Kameda Medical Center at Chiba Prefecture, Japan during February 2017. During  
21  
22 95 this period, an anonymous, self-administered questionnaire was distributed to 1,152 workers at  
23  
24 96 the nursing department in the center. After the workers answered the questionnaires, they put  
25  
26 97 them in sealed envelopes. Then, occupational health staff collected and sent the envelopes to the  
27  
28 98 authors. Staff other than the authors were not allowed to open the sealed envelopes. Written  
29  
30 99 informed consent was obtained from each participant. All procedures were approved by the  
31  
32  
33 100 Research Ethics Committee of Kameda Medical Center (Approval No. 16-159) and carried out  
34  
35 101 according to the Declaration of Helsinki.  
36

37 102

### 39 103 **Study measures**

41 104 The following items were assessed using the self-administered questionnaire: age, sex, height,  
42  
43 105 weight, occupation type (registered nurse, assistant nurse, midwife, or nursing aid), rotating night  
44  
45 106 shift (frequency of shift work per month), severity of LBP, previous episode of LBP, sleep  
46  
47 107 problem, fear-avoidance (kinesiophobia), depressive condition, physical flexibility, and lifting at  
48  
49 108 work. Body mass index (BMI) was calculated as weight (kg) divided by the square of height (m).

51 109 The severity of LBP, evaluated by respondents, was classified into four grades: grade 0 (no  
52  
53 110 LBP), grade 1 (LBP that did not interfere with work), grade 2 (LBP that interfered with work),  
54  
55 111 and grade 3 (LBP that interfered with work and required sick leave). These grades were  
56  
57  
58 112 determined with reference to Von Korff's grading method.<sup>22</sup> The area of LBP (between the costal  
59  
60

1  
2  
3  
4  
5 113 margin and inferior gluteal folds) was indicated as a diagram in the questionnaire.<sup>23</sup> LBP was  
6  
7 114 defined as pain lasting for  $\geq 1$  day and experienced during the past one month, in accordance with  
8  
9 115 the standard definition of LBP proposed by Dionne et al.<sup>24</sup> LBP associated with menstrual periods,  
10  
11 116 pregnancy, or febrile illness was excluded. Individuals with disabling LBP were defined as those  
12  
13 117 who had LBP interfering with work, irrespective of sick leave because of LBP (grade 2 or 3).<sup>25</sup>  
14  
15 118 Past LBP history characteristics were evaluated in a question regarding the previous episode of  
16  
17 119 LBP.

18  
19  
20 120 Sleep problems were assessed using questions about the sleep duration and sleep habits in the  
21  
22 121 previous month.<sup>26</sup> Disability of sleep duration was defined by durations  $< 6$  hours. Difficulty  
23  
24 122 initiating sleep was defined as taking more than 30 min to fall asleep. Difficulty maintaining sleep  
25  
26 123 and early morning awakening were defined by the occurrence of nocturnal awakenings or early  
27  
28 124 morning awakenings three times or more per week. The presence of insomnia was defined if the  
29  
30 125 participants reported at least one positive response to the three symptoms of sleep habits above.<sup>26</sup>

31  
32  
33 126 To assess fear of movement/(re)injury, we used the short version of the Tampa Scale for  
34  
35 127 Kinesiophobia (TSK-11).<sup>27</sup> The TSK-11 consists of 11 items, each of which is scored on a 4-point  
36  
37 128 Likert scale ranging from 1 (strongly disagree) to 4 (strongly agree). The total scores range from  
38  
39 129 11 to 44, with higher scores indicating greater fear of movement/(re)injury. The Japanese version  
40  
41 130 of TSK-11 has been translated and validated by Matsudaira et al.<sup>28 29</sup> Participants' scores were  
42  
43 131 classified into tertiles according to their total scores.

44  
45 132 Depressive condition was evaluated by using the Kessler 6-item psychological distress scale  
46  
47 133 (K6).<sup>30</sup> The K6 consists of six items that assess how frequently respondents experienced  
48  
49 134 symptoms of psychological distress such as nervousness, negative affect, fatigue, and  
50  
51 135 worthlessness over the past 30 days. Each item was rated on a 5-point scale ranging from 0 (none  
52  
53 136 of the time) to 4 (all of the time), with the total score ranging from 0 to 24. The K6 has been  
54  
55 137 translated to a Japanese version, whose reliability and validity have been confirmed by Furukawa  
56  
57 138 et al.<sup>31</sup> Individuals with a K6 score of  $\geq 10$  were defined as having a depressive condition in

1  
2  
3  
4  
5 139 accordance with a previous study.<sup>32</sup>

6  
7 140 Physical flexibility was assessed by using the modified finger-to-floor distance<sup>33</sup> which mainly  
8  
9 141 represents trunk flexibility. The grade of this item was rated on a 7-point scale: 1) fingertips  
10  
11 142 cannot reach across the knees; 2) fingertips can reach across the knees but wrists not; 3) wrists  
12  
13 143 can reach beyond the knees, but fingertips cannot reach the ankles; 4) fingertips can reach the  
14  
15 144 ankles; 5) fingertips can touch the floor; 6) all of the fingers can touch the floor; and 7) palms can  
16  
17 145 touch the floor. Flexibility was classified into two groups based on whether wrists could reach  
18  
19 146 beyond the knee, but fingertips could not reach the ankles.<sup>25</sup>

20  
21  
22 147 Physical work demand was measured with a question exploring the frequency of lifting at work.  
23  
24 148 The frequency of lifting was divided into 0, 1-4, 5-9, 10 times per shift, and lifting  $\geq 5$  times per  
25  
26 149 shift was defined as frequent with reference to a previous study.<sup>16</sup>

27  
28  
29 150

### 30 31 151 **Statistical analysis**

32  
33 152 We conducted a multivariable logistic regression analysis because our dependent variable  
34  
35 153 (disabling LBP) was dichotomous. One guideline has suggested that a sample size with at least  
36  
37 154 10 cases for each independent variable is required to estimate a discriminant function parameters  
38  
39 155 accurately in logistic regression analysis.<sup>34</sup> Therefore, based on this guideline and our 11 predictor  
40  
41 156 variables, we required 110 cases for our analysis. Moreover, considering the prevalence of  
42  
43 157 disabling LBP and missing data, we calculated 1,000 participants to ensure the accurate estimation  
44  
45 158 in the analysis.

46  
47 159 Data were presented as median (25th, 75th percentile) for continuous variables or number (%)  
48  
49 160 for categorical variables. Characteristics of participants were compared using the chi-squared test  
50  
51 161 for categorical variables and Wilcoxon rank-sum test for continuous variables. To assess factors  
52  
53 162 associated with disabling LBP, a logistic regression model was used to estimate the odds ratio  
54  
55 163 (OR) and 95% confidence interval (CI) for disabling LBP. In the model, the following factors  
56  
57 164 were included for adjustment: sex, age, BMI, frequency of shift work, sleep duration, insomnia,  
58  
59  
60

1  
2  
3  
4  
5 165 previous episode of LBP, TSK and K6 scores, flexibility, lifting at work. Multicollinearity was  
6  
7 166 not suspected as all variance inflation factors (VIFs) were <2. A p-value less than 0.05 was  
8  
9 167 considered to be statistically significant (two-sided). All statistical analyses were performed using  
10  
11 168 JMP version 13.0 (SAS Institute Inc., Cary, NC, USA).  
12  
13  
14 169

## 16 170 **Patient and public involvement**

17 171 Patients and the public were not involved in the design or planning of the study.  
18  
19  
20 172

## 22 173 **RESULTS**

24 174 Of all workers at the nursing department in the center, 1075 respondents provided answers in  
25  
26 175 the questionnaires (response rate: 93.3%). Since the present study was focused on nursing  
27  
28 176 personnel who provide direct care in the center, 146 employees who were not related to direct  
29  
30 177 nursing care (clerical work or providing guidance to patients, etc.) were excluded. We further  
31  
32 178 excluded 211 participants with missing data for any variable. As a result, 718 nursing staff  
33  
34 179 completed the questionnaire with no missing data and were included in the analysis (completion  
35  
36 180 rate: 66.8%).  
37  
38

39 181 The median age of participants in the present study was 31.0 years, and 79.7% of the  
40  
41 182 participants were female. The distribution of LBP severity according to grade was as follows:  
42  
43 183 grade 0 (n = 233), grade 1 (n = 375), grade 2 (n = 104), and grade 3 (n = 6). Thus, 15.3% of the  
44  
45 184 included participants were reported to have disabling LBP. The characteristics of participants with  
46  
47 185 or without disabling LBP are shown in Table 1. The proportions of insomnia ( $p < 0.001$ ) and  
48  
49 186 previous episode of LBP ( $p < 0.001$ ) among participants with disabling LBP were higher relative  
50  
51 187 to those observed in participants without disabling LBP. The proportions of those who had high  
52  
53 188 TSK ( $p < 0.001$ ) or K6 ( $p < 0.038$ ) scores were higher in the disabling LBP group than in the no  
54  
55 189 disabling LBP group. In contrast, the groups with and without disabling LBP showed no  
56  
57 190 significant differences for physical flexibility and the frequency of lifting at work.  
58  
59  
60

1  
2  
3  
4  
5 191 We calculated the crude and adjusted ORs and their 95% CIs for disabling LBP (Table 2). The  
6  
7 192 non-adjusted analysis showed that insomnia, previous episode of LBP, and TSK and K6 scores  
8  
9 193 were significantly associated with disabling LBP. Multivariable analysis after adjusting for sex,  
10  
11 194 age, BMI, and all explanatory variables showed that insomnia (adjusted OR [aOR]: 1.66, 95%  
12  
13 195 CI: 1.05-2.62), a previous episode of LBP (aOR: 4.31, 95% CI: 1.50-12.41), and TSK score (aOR:  
14  
15 196 2.08, 95% CI: 1.11-3.89 in middle, aOR: 6.13, 95% CI: 3.34-11.27 in high) remained significantly  
16  
17 197 associated with disabling LBP.  
18  
19  
20  
21  
22  
23  
24  
25  
26  
27  
28  
29  
30  
31  
32  
33  
34  
35  
36  
37  
38  
39  
40  
41  
42  
43  
44  
45  
46  
47  
48  
49  
50  
51  
52  
53  
54  
55  
56  
57  
58  
59  
60



Table 1. Characteristics of the study participants

|                                    | Disabling LBP<br>(n = 110) | No disabling LBP<br>(n = 608) | <i>p</i> -value |
|------------------------------------|----------------------------|-------------------------------|-----------------|
| Sex                                |                            |                               |                 |
| Male                               | 31 (28.2%)                 | 115 (18.9%)                   | 0.026           |
| Female                             | 79 (71.8%)                 | 493 (81.1%)                   |                 |
| Age, years                         | 27.5 (24.0, 40.0)          | 31.0 (24.0, 42.0)             | 0.052           |
| Body mass index, kg/m <sup>2</sup> | 21.6 (19.8, 23.3)          | 21.2 (19.5, 23.9)             | 0.793           |
| Occupation type                    |                            |                               |                 |
| Registered nurse                   | 88 (80.0%)                 | 495 (81.4%)                   | 0.886           |
| Assistant nurse (practical nurse)  | 2 (1.8%)                   | 16 (2.6%)                     |                 |
| Midwife                            | 4 (3.6%)                   | 18 (3.0%)                     |                 |
| Nursing aid                        | 16 (14.5%)                 | 79 (13.0%)                    |                 |
| Frequency of shift work, per month | 6.0 (2.5, 10.0)            | 6.0 (0.0, 10.8)               | 0.571           |
| Sleep duration                     |                            |                               |                 |
| >6 hours                           | 78 (70.9%)                 | 436 (71.7%)                   | 0.864           |
| <6 hours                           | 32 (29.1%)                 | 172 (28.3%)                   |                 |
| Insomnia                           |                            |                               |                 |
| Not have insomnia                  | 47 (42.7%)                 | 366 (60.2%)                   | < 0.001         |
| Have insomnia                      | 63 (57.3%)                 | 242 (39.8%)                   |                 |
| Previous episode of LBP            |                            |                               |                 |
| No                                 | 4 (3.6%)                   | 97 (16.0%)                    | < 0.001         |
| Yes                                | 106 (96.4%)                | 511 (84.0%)                   |                 |
| TSK                                |                            |                               |                 |
| Low ( $\leq 17$ )                  | 18 (16.4%)                 | 252 (41.4%)                   | < 0.001         |
| Middle (18-23)                     | 32 (29.1%)                 | 206 (33.9%)                   |                 |
| High ( $\geq 24$ )                 | 60 (54.5%)                 | 150 (24.7%)                   |                 |
| K6                                 |                            |                               |                 |
| <10                                | 78 (70.9%)                 | 485 (79.8%)                   | 0.038           |
| $\geq 10$                          | 32 (29.1%)                 | 123 (20.2%)                   |                 |
| Flexibility                        |                            |                               |                 |
| Flexible                           | 75 (68.2%)                 | 443 (72.9%)                   | 0.314           |
| Not flexible                       | 35 (31.6%)                 | 165 (27.1%)                   |                 |
| Lifting                            |                            |                               |                 |
| Not frequent                       | 45 (40.9%)                 | 289 (47.5%)                   | 0.200           |
| Frequent                           | 65 (59.1%)                 | 319 (52.5%)                   |                 |

Data are presented as number (percentage) or median (25th, 75th percentile).

LBP, Low back pain; TSK, Tampa scale for kinesiophobia

Table 2. Association between disabling low back pain and independent variables from logistic

regression models

|                                    | Crude             |                 | Adjusted*         |                 |
|------------------------------------|-------------------|-----------------|-------------------|-----------------|
|                                    | OR (95% CI)       | <i>p</i> -value | OR (95% CI)       | <i>p</i> -value |
| Frequency of shift work, per month | 1.00 (0.97-1.04)  | 0.783           | 0.98 (0.94-1.02)  | 0.390           |
| Sleep duration                     |                   |                 |                   |                 |
| >6 hours                           | 1.00              |                 | 1.00              |                 |
| <6 hours                           | 1.04 (0.66-1.63)  | 0.864           | 1.12 (0.68-1.83)  | 0.659           |
| Insomnia                           |                   |                 |                   |                 |
| Not have insomnia                  | 1.00              |                 | 1.00              |                 |
| Have insomnia                      | 2.03 (1.34-3.06)  | < 0.001         | 1.66 (1.05-2.62)  | 0.029           |
| Previous episode of LBP            |                   |                 |                   |                 |
| No                                 | 1.00              |                 | 1.00              |                 |
| Yes                                | 5.03 (1.81-13.97) | 0.002           | 4.31 (1.50-12.41) | 0.007           |
| TSK                                |                   |                 |                   |                 |
| Low ( $\leq 17$ )                  | 1.00              |                 | 1.00              |                 |
| Middle (18-23)                     | 2.17 (1.19-3.99)  | 0.012           | 2.08 (1.11-3.89)  | 0.022           |
| High ( $\geq 24$ )                 | 5.60 (3.19-9.84)  | < 0.001         | 6.13 (3.34-11.27) | < 0.001         |
| K6                                 |                   |                 |                   |                 |
| <10                                | 1.00              |                 | 1.00              |                 |
| $\geq 10$                          | 1.62 (1.02-2.55)  | 0.039           | 1.06 (0.64-1.75)  | 0.834           |
| Flexibility                        |                   |                 |                   |                 |
| Flexible                           | 1.00              |                 | 1.00              |                 |
| Not flexible                       | 1.25 (0.81-1.94)  | 0.314           | 0.95 (0.59-1.53)  | 0.846           |
| Lifting                            |                   |                 |                   |                 |
| Not frequent                       | 1.00              |                 | 1.00              |                 |
| Frequent                           | 1.31 (0.87-1.98)  | 0.201           | 0.99 (0.62-1.58)  | 0.973           |

LBP, Low back pain; TSK, Tampa scale for kinesiophobia; OR, Odds ratio; CI, Confidence interval

\*Adjusted for sex, age, body mass index, and all other variables which indicated in this table.

198

199

## 200 DISCUSSION

201 The present study investigated the association of disabling LBP with related factors via a  
 202 multifaceted assessment among nursing personnel at a tertiary hospital. The results of our  
 203 multivariable logistic regression analysis showed that insomnia, previous episodes of LBP, and

1  
2  
3  
4  
5 204 kinesiophobia were independently associated with disabling LBP. To our knowledge, this is the  
6  
7 205 first study that identified a significant association of pain-related fear and insomnia with disabling  
8  
9 206 LBP among nursing personnel in Japan.

11 207 In this study, disabling LBP was set as the outcome of interest to identify risk factors for LBP  
12  
13 208 among nursing personnel. In occupational fields, absence from work (absenteeism) due to LBP is  
14  
15 209 often used as the outcome of disability. However, the number of individuals taking a sick leave  
16  
17 210 due to LBP is considerably small. A previous international epidemiological study showed that the  
18  
19 211 prevalence of absenteeism due to musculoskeletal disorders, mainly LBP, was much less common  
20  
21 212 in Japan relative to that in the UK.<sup>11</sup> Moreover, it has been suggested that the loss of work  
22  
23 213 performance due to LBP has a greater negative economic impact on individuals and workplaces  
24  
25 214 in terms of healthcare costs and work productivity than sick leaves due to LBP.<sup>35 36</sup> Therefore, it  
26  
27 215 may be appropriate to define disabling LBP as LBP interfering with work performance with or  
28  
29 216 without sick leave.

32 217 Our results showed that high TSK scores were significantly associated with disabling LBP  
33  
34 218 among nursing personnel after adjustment for various confounding factors (the OR [95% CI] of  
35  
36 219 the highest tertile of TSK: 6.13 [3.34-11.27]). This result was similar to those obtained in our  
37  
38 220 previous studies with white-collar workers<sup>32</sup> and workers at nursing care facilities,<sup>37</sup> which  
39  
40 221 implies that kinesiophobia is an important factor for LBP regardless of job type. Kinesiophobia,  
41  
42 222 an irrational and debilitating fear of movement/(re)injury, can cause a negative vicious cycle in  
43  
44 223 the fear-avoidance model.<sup>38</sup> Avoidance of behavior based on kinesiophobia can cause physical  
45  
46 224 inactivity, which has a negative impact on physical and psychological aspects and results in  
47  
48 225 persistence of LBP. Werti et al reported that fear-avoidance beliefs were an important prognostic  
49  
50 226 factor for LBP chronicity<sup>7</sup> and predicted poor treatment responses in subjects with LBP of less  
51  
52 227 than 6 months.<sup>39</sup> Moreover, a recent systematic review has indicated that a greater degree of  
53  
54 228 kinesiophobia at baseline predicted the progression of disability and the subsequent decline of  
55  
56 229 quality of life among subjects with chronic musculoskeletal pain.<sup>40</sup> Therefore, our results suggest  
57  
58  
59  
60

1  
2  
3  
4  
5 230 that assessment of negative beliefs such as kinesiophobia may help prevent the chronicity of LBP  
6  
7 231 in the workplace.

8  
9 232 We found that the presence of a previous episode of LBP was a significant factor associated  
10  
11 233 with disabling LBP, which is consistent with our earlier study in Japan.<sup>25</sup> Previous systematic  
12  
13 234 reviews also showed that individuals with a history of LBP were at increased risk of future  
14  
15 235 episodes.<sup>9 41</sup> Indeed, LBP has been suggested to be liable to recurrence. The recurrence rate of  
16  
17 236 LBP within the first year after the episode has been reported to range from 24% to 50% or more.<sup>41</sup>  
18  
19 237 <sup>42</sup> This may be because individuals with LBP sometimes reduce their levels of physical activity,  
20  
21 238 which leads to physical deconditioning, including functional changes of the trunk. A recent study  
22  
23 239 indicated that trunk muscle mass was associated with LBP disability.<sup>43</sup> Additionally, our results  
24  
25 240 may indicate that individuals with LBP continue to have the risk factors responsible for the initial  
26  
27 241 occurrence of LBP. Thus, a previous episode of LBP may be an important predictor of future  
28  
29 242 episodes also among nursing personnel.

30  
31  
32 243 In this study, sleep disturbance defined as insomnia was found to be an independent factor  
33  
34 244 relevant to disabling LBP among nursing personnel. Previous studies reported that more than 50%  
35  
36 245 of those who suffer from LBP have sleep problems.<sup>44 45</sup> Although the relationship between  
37  
38 246 disturbed sleep and pain has been considered to be bidirectional, recent studies have focused on  
39  
40 247 the influence of disturbed sleep on pain. Several prospective studies have indicated that sleep  
41  
42 248 problems were associated with a higher risk of chronic musculoskeletal pain onset including  
43  
44 249 LBP.<sup>10 46</sup> Our findings may be attributable to the decreased pain threshold consequent to sleep  
45  
46 250 disturbance, which has been indicated by experimental studies.<sup>47</sup> Although the mechanism  
47  
48 251 underlying the association between sleep disturbance and pain remains to be fully understood, the  
49  
50 252 mesolimbic dopamine system has been suggested to play a role via an overlapping  
51  
52 253 neurophysiological mechanism between sleep and pain;<sup>48</sup> however, because the potential  
53  
54 254 mechanisms involved in these interactions are beyond the scope of our study, further studies  
55  
56 255 including pathophysiological assessments are needed. Our results suggest that in the treatment of  
57  
58  
59  
60

1  
2  
3  
4  
5 256 individuals with disabling LBP, assessment and management of both sleep problems and LBP  
6  
7 257 may have more positive effects on recovery relative to those achieved by targeting sleep or LBP  
8  
9 258 independently.

11 259 The present study investigated the association of disabling LBP with multidimensional factors  
12  
13 260 among nursing personnel, including selective variables with reference to previous findings. These  
14  
15 261 factors were assessed using validated tools, which would reduce the risk of classification bias.  
16  
17 262 However, the study had some limitations. First, participants were recruited from a single hospital,  
18  
19 263 which might limit the generalizability of our results. Second, due to the cross-sectional design,  
20  
21 264 the causality of the associations cannot be determined. Finally, our results might be affected by  
22  
23 265 some potential confounding factors such as psychosocial work-related stress, other lifestyle habits,  
24  
25 266 or socioeconomic status that were not considered in our study.

28 267 In conclusion, the present findings obtained with a multivariable logistic regression analysis  
29  
30 268 showed that kinesiophobia, previous episodes of LBP, and insomnia were significantly associated  
31  
32 269 with disabling LBP among nursing personnel. In the future, workplace interventions considering  
33  
34 270 the assessment of these factors can help reduce the incidence of disabling LBP among nursing  
35  
36 271 staff, although further prospective studies are needed to elucidate a causal relationship.

37  
38  
39 272

### 41 273 **Acknowledgements**

42  
43 274 We would like to thank Mrs. Noriko Maruyama, Mrs. Tsuyako Takanashi, Mrs. Kyoko  
44  
45 275 Yamamoto, and all participants at the nursing department in Kameda Medical Center for  
46  
47 276 supporting the study.

48  
49  
50 277

### 51 278 **Funding sources:**

52  
53 279 This study was supported by a grant from Industrial Disease Clinical Research Grants (No.  
54  
55 280 14020301). The funder had no role in study design, data collection and analysis, decision to  
56  
57 281 publish, or preparation of the manuscript.

1  
2  
3  
4  
5 282  
6

7 283 **Competing interests:**

8  
9 284 KM reports grants from the Ministry of Health, Labor and Welfare during the conduct of the  
10  
11 285 study; grants and personal fees from AYUMI Pharmaceutical Corporation, Nippon Zoki  
12  
13 286 Pharmaceutical Co., Ltd., Ono Pharmaceutical Co., Ltd, Shionogi & Co., Ltd., Eli Lilly Japan,  
14  
15 287 Astellas Pharma Inc., Toto Ltd., Eisai Co., Ltd., Teijin Pharma Limited, Japan Inc., and Hisamitsu  
16  
17 288 Pharmaceutical Co., Inc.; personal fees from Pfizer Inc., Janssen Pharmaceutical K.K., Kaken  
18  
19 289 Pharmaceutical Co., Ltd., Mochida Pharmaceutical Co., Ltd., and Daiichi Sankyo Company,  
20  
21 290 Limited; grants from Sompo Holdings, Inc., MTG, NuVasive Japan , and Murata Manufacturing  
22  
23 291 Co., Ltd.; grants from Okamura Corporation; and non-financial support from Trunk Solution Co.,  
24  
25 292 Ltd. outside the submitted work. The other authors report no conflicts of interest in this work.  
26  
27

28  
29 293

30 294 **Authors' contributions**

31  
32 295 TY and KM contributed to the conceptualization of this study. TY and SI contributed to the data  
33  
34 296 acquisition. TY and HO analyzed and interpreted the data. SM, AK, and KM contributed to the  
35  
36 297 supervision of this study. TY drafted the manuscript. All authors have read and approved the final  
37  
38 298 manuscript.  
39

40  
41 299

42  
43 300 **Data availability statement**

44  
45 301 The data used in the current study are available on reasonable request and only after approval by  
46  
47 302 the Research Ethics Committee of Kameda Medical Center.  
48

49  
50 303

51 304 **References**

52  
53 305 1. GBD 2017 Disease and Injury Incidence and Prevalence Collaborators. Global, regional, and  
54  
55 306 national incidence, prevalence, and years lived with disability for 354 diseases and injuries  
56  
57 307 for 195 countries and territories, 1990-2017: a systematic analysis for the Global Burden of  
58  
59  
60

- 1  
2  
3  
4  
5 308 Disease Study 2017. *Lancet* 2018;392:1789-858.
- 6  
7 309 2. Dagenais S, Caro J, Haldeman S. A systematic review of low back pain cost of illness studies  
8 310 in the United States and internationally. *Spine J* 2008;8:8-20.
- 9  
10 311 3. Dieleman JL, Baral R, Birger M, et al. US Spending on Personal Health Care and Public  
11 312 Health, 1996-2013. *JAMA* 2016;316:2627-46.
- 12  
13 313 4. Hoogendoorn WE, van Poppel MN, Bongers PM, et al. Physical load during work and leisure  
14 314 time as risk factors for back pain. *Scand J Work Environ Health* 1999;25:387-403.
- 15  
16 315 5. Sadler SG, Spink MJ, Ho A, et al. Restriction in lateral bending range of motion, lumbar  
17 316 lordosis, and hamstring flexibility predicts the development of low back pain: a systematic  
18 317 review of prospective cohort studies. *BMC Musculoskelet Disord* 2017;18:179.
- 19  
20 318 6. Pinheiro MB, Ferreira ML, Refshauge K, et al. Symptoms of Depression and Risk of New  
21 319 Episodes of Low Back Pain: A Systematic Review and Meta-Analysis. *Arthritis Care Res*  
22 320 *(Hoboken)* 2015;67:1591-603.
- 23  
24 321 7. Wertli MM, Rasmussen-Barr E, Weiser S, et al. The role of fear avoidance beliefs as a  
25 322 prognostic factor for outcome in patients with nonspecific low back pain: a systematic review.  
26 323 *Spine J* 2014;14:816-36 e4.
- 27  
28 324 8. Crombez G, Vlaeyen JW, Heuts PH, et al. Pain-related fear is more disabling than pain itself:  
29 325 evidence on the role of pain-related fear in chronic back pain disability. *Pain* 1999;80:329-  
30 326 39.
- 31  
32 327 9. Taylor JB, Goode AP, George SZ, et al. Incidence and risk factors for first-time incident low  
33 328 back pain: a systematic review and meta-analysis. *Spine J* 2014;14:2299-319.
- 34  
35 329 10. Mork PJ, Vik KL, Moe B, et al. Sleep problems, exercise and obesity and risk of chronic  
36 330 musculoskeletal pain: the Norwegian HUNT study. *Eur J Public Health* 2014;24:924-9.
- 37  
38 331 11. Matsudaira K, Palmer KT, Reading I, et al. Prevalence and correlates of regional pain and  
39 332 associated disability in Japanese workers. *Occup Environ Med* 2011;68:191-6.
- 40  
41 333 12. Leighton DJ, Reilly T. Epidemiological aspects of back pain: the incidence and prevalence of  
42  
43  
44  
45  
46  
47  
48  
49  
50  
51  
52  
53  
54  
55  
56  
57  
58  
59  
60

- 1  
2  
3  
4  
5 334 back pain in nurses compared to the general population. *Occup Med (Lond)* 1995;45:263-7.  
6  
7 335 13. Genevay S, Cedraschi C, Courvoisier DS, et al. Work related characteristics of back and neck  
8  
9 336 pain among employees of a Swiss University Hospital. *Joint Bone Spine* 2011;78:392-7.  
10  
11 337 14. Yassi A, Lockhart K. Work-relatedness of low back pain in nursing personnel: a systematic  
12  
13 338 review. *Int J Occup Environ Health* 2013;19:223-44.  
14  
15 339 15. Burdorf A, Koppelaar E, Evanoff B. Assessment of the impact of lifting device use on low  
16  
17 340 back pain and musculoskeletal injury claims among nurses. *Occup Environ Med*  
18  
19 341 2013;70:491-7.  
20  
21 342 16. Eriksen W, Bruusgaard D, Knardahl S. Work factors as predictors of intense or disabling low  
22  
23 343 back pain; a prospective study of nurses' aides. *Occup Environ Med* 2004;61:398-404.  
24  
25 344 17. d'Ettorre G, Vullo A, Pellicani V, et al. Acute low back pain among registered nurses.  
26  
27 345 Organizational implications for practice management. *Ann Ig* 2018;30:482-9.  
28  
29 346 18. Schlossmacher R, Amaral FG. Low back injuries related to nursing professionals working  
30  
31 347 conditions: a systematic review. *Work* 2012;41 Suppl 1:5737-8.  
32  
33 348 19. Dawson AP, McLennan SN, Schiller SD, et al. Interventions to prevent back pain and back  
34  
35 349 injury in nurses: a systematic review. *Occup Environ Med* 2007;64:642-50.  
36  
37 350 20. Van Hoof W, O'Sullivan K, O'Keeffe M, et al. The efficacy of interventions for low back pain  
38  
39 351 in nurses: A systematic review. *Int J Nurs Stud* 2018;77:222-31.  
40  
41 352 21. Coggon D, Ntani G, Palmer KT, et al. Drivers of international variation in prevalence of  
42  
43 353 disabling low back pain: Findings from the Cultural and Psychosocial Influences on  
44  
45 354 Disability study. *Eur J Pain* 2019;23:35-45.  
46  
47 355 22. Von Korff M, Ormel J, Keefe FJ, et al. Grading the severity of chronic pain. *Pain*  
48  
49 356 1992;50:133-49.  
50  
51 357 23. Kuorinka I, Jonsson B, Kilbom A, et al. Standardised Nordic questionnaires for the analysis  
52  
53 358 of musculoskeletal symptoms. *Appl Ergon* 1987;18:233-7.  
54  
55 359 24. Dionne CE, Dunn KM, Croft PR, et al. A consensus approach toward the standardization of  
56  
57  
58  
59  
60



- 1  
2  
3  
4  
5 360 back pain definitions for use in prevalence studies. *Spine (Phila Pa 1976)* 2008;33:95-103.
- 6  
7 361 25. Matsudaira K, Konishi H, Miyoshi K, et al. Potential risk factors for new onset of back pain  
8  
9 362 disability in Japanese workers: findings from the Japan epidemiological research of  
10  
11 363 occupation-related back pain study. *Spine (Phila Pa 1976)* 2012;37:1324-33.
- 12  
13  
14 364 26. Nakata A, Ikeda T, Takahashi M, et al. Sleep-related risk of occupational injuries in Japanese  
15  
16 365 small and medium-scale enterprises. *Ind Health* 2005;43:89-97.
- 17  
18 366 27. Woby SR, Roach NK, Urmston M, et al. Psychometric properties of the TSK-11: a shortened  
19  
20 367 version of the Tampa Scale for Kinesiophobia. *Pain* 2005;117:137-44.
- 21  
22 368 28. Kikuchi N, Matsudaira K, Sawada T, et al. Psychometric properties of the Japanese version  
23  
24 369 of the Tampa Scale for Kinesiophobia (TSK-J) in patients with whiplash neck injury pain  
25  
26 370 and/or low back pain. *J Orthop Sci* 2015;20:985-92.
- 27  
28  
29 371 29. Matsudaira K, Inuzuka K, Kikuchi N, et al. Development of a Japanese Version of the Tampa  
30  
31 372 Scale for Kinesiophobia (TSK-J): Translation and Linguistic Validation. *Rinsho Seikei Geka*  
32  
33 373 (*Clin Orthop Surg*) 2013;48:13-9.
- 34  
35 374 30. Kessler RC, Andrews G, Colpe LJ, et al. Short screening scales to monitor population  
36  
37 375 prevalences and trends in non-specific psychological distress. *Psychol Med* 2002;32:959-76.
- 38  
39 376 31. Furukawa TA, Kawakami N, Saitoh M, et al. The performance of the Japanese version of the  
40  
41 377 K6 and K10 in the World Mental Health Survey Japan. *Int J Methods Psychiatr Res*  
42  
43 378 2008;17:152-8.
- 44  
45 379 32. Wakaizumi K, Yamada K, Oka H, et al. Fear-avoidance beliefs are independently associated  
46  
47 380 with the prevalence of chronic pain in Japanese workers. *J Anesth* 2017;31:255-62.
- 48  
49 381 33. Akaha H, Matsudaira K, Takeshita K, et al. Modified measurement of finger-floor distance -  
50  
51 382 self-assessment bending scale-. *Journal of Japanese Society of Lumbar Spine Disorders*  
52  
53 383 2008;14:164-9.
- 54  
55  
56 384 34. Katz MH. *Multivariable Analysis: A Practical Guide for Clinicians*. 2nd edition. Cambridge:  
57  
58 385 Cambridge University Press 2006.
- 59  
60

- 1  
2  
3  
4  
5 386 35. Loeppke R, Taitel M, Richling D, et al. Health and productivity as a business strategy. *J Occup*  
6  
7 387 *Environ Med* 2007;49:712-21.  
8  
9 388 36. Wada K, Arakida M, Watanabe R, et al. The economic impact of loss of performance due to  
10  
11 389 absenteeism and presenteeism caused by depressive symptoms and comorbid health  
12  
13 390 conditions among Japanese workers. *Ind Health* 2013;51:482-9.  
14  
15 391 37. Yoshimoto T, Oka H, Fujii K, et al. Survey on chronic disabling low back pain among care  
16  
17 392 workers at nursing care facilities: a multicenter collaborative cross-sectional study. *J Pain*  
18  
19 393 *Res* 2019;12:1025-32.  
20  
21 394 38. Leeuw M, Goossens ME, Linton SJ, et al. The fear-avoidance model of musculoskeletal pain:  
22  
23 395 current state of scientific evidence. *J Behav Med* 2007;30:77-94.  
24  
25 396 39. Wertli MM, Rasmussen-Barr E, Held U, et al. Fear-avoidance beliefs-a moderator of  
26  
27 397 treatment efficacy in patients with low back pain: a systematic review. *Spine J* 2014;14:2658-  
28  
29 398 78.  
30  
31 399 40. Luque-Suarez A, Martinez-Calderon J, Falla D. Role of kinesiophobia on pain, disability and  
32  
33 400 quality of life in people suffering from chronic musculoskeletal pain: a systematic review.  
34  
35 401 *Br J Sports Med* 2019;53:554-9.  
36  
37 402 41. Hestbaek L, Leboeuf-Yde C, Manniche C. Low back pain: what is the long-term course? A  
38  
39 403 review of studies of general patient populations. *Eur Spine J* 2003;12:149-65.  
40  
41 404 42. Stanton TR, Henschke N, Maher CG, et al. After an episode of acute low back pain, recurrence  
42  
43 405 is unpredictable and not as common as previously thought. *Spine (Phila Pa 1976)*  
44  
45 406 2008;33:2923-8.  
46  
47 407 43. Hori Y, Hoshino M, Inage K, et al. ISSLS PRIZE IN CLINICAL SCIENCE 2019: clinical  
48  
49 408 importance of trunk muscle mass for low back pain, spinal balance, and quality of life-a  
50  
51 409 multicenter cross-sectional study. *Eur Spine J* 2019;28:914-21.  
52  
53 410 44. Hagen EM, Svensen E, Eriksen HR, et al. Comorbid subjective health complaints in low back  
54  
55 411 pain. *Spine (Phila Pa 1976)* 2006;31:1491-5.  
56  
57  
58  
59  
60

- 1  
2  
3  
4  
5 412 45. Alsaadi SM, McAuley JH, Hush JM, et al. Prevalence of sleep disturbance in patients with  
6  
7 413 low back pain. *Eur Spine J* 2011;20:737-43.  
8  
9 414 46. Canivet C, Ostergren PO, Choi B, et al. Sleeping problems as a risk factor for subsequent  
10  
11 415 musculoskeletal pain and the role of job strain: results from a one-year follow-up of the  
12  
13 416 Malmo Shoulder Neck Study Cohort. *Int J Behav Med* 2008;15:254-62.  
14  
15  
16 417 47. Kundermann B, Krieg JC, Schreiber W, et al. The effect of sleep deprivation on pain. *Pain*  
17  
18 418 *Res Manag* 2004;9:25-32.  
19  
20 419 48. Finan PH, Smith MT. The comorbidity of insomnia, chronic pain, and depression: dopamine  
21  
22 420 as a putative mechanism. *Sleep Med Rev* 2013;17:173-83.  
23  
24  
25  
26  
27  
28  
29  
30  
31  
32  
33  
34  
35  
36  
37  
38  
39  
40  
41  
42  
43  
44  
45  
46  
47  
48  
49  
50  
51  
52  
53  
54  
55  
56  
57  
58  
59  
60

STROBE Statement—Checklist of items that should be included in reports of *cross-sectional studies*

|                              | Item No | Recommendation                                                                                                                                                                                               | Page No |
|------------------------------|---------|--------------------------------------------------------------------------------------------------------------------------------------------------------------------------------------------------------------|---------|
| <b>Title and abstract</b>    | 1       | (a) Indicate the study's design with a commonly used term in the title or the abstract                                                                                                                       | P 1     |
|                              |         | (b) Provide in the abstract an informative and balanced summary of what was done and what was found                                                                                                          | P 2     |
| <b>Introduction</b>          |         |                                                                                                                                                                                                              |         |
| Background/rationale         | 2       | Explain the scientific background and rationale for the investigation being reported                                                                                                                         | P 4     |
| Objectives                   | 3       | State specific objectives, including any prespecified hypotheses                                                                                                                                             | P 4-5   |
| <b>Methods</b>               |         |                                                                                                                                                                                                              |         |
| Study design                 | 4       | Present key elements of study design early in the paper                                                                                                                                                      | P 5     |
| Setting                      | 5       | Describe the setting, locations, and relevant dates, including periods of recruitment, exposure, follow-up, and data collection                                                                              | P 5     |
| Participants                 | 6       | (a) Give the eligibility criteria, and the sources and methods of selection of participants                                                                                                                  | P 5     |
| Variables                    | 7       | Clearly define all outcomes, exposures, predictors, potential confounders, and effect modifiers. Give diagnostic criteria, if applicable                                                                     | P 5-7   |
| Data sources/<br>measurement | 8*      | For each variable of interest, give sources of data and details of methods of assessment (measurement). Describe comparability of assessment methods if there is more than one group                         | P 5-7   |
| Bias                         | 9       | Describe any efforts to address potential sources of bias                                                                                                                                                    | P 13    |
| Study size                   | 10      | Explain how the study size was arrived at                                                                                                                                                                    | NA      |
| Quantitative variables       | 11      | Explain how quantitative variables were handled in the analyses. If applicable, describe which groupings were chosen and why                                                                                 | P 5-7   |
| Statistical methods          | 12      | (a) Describe all statistical methods, including those used to control for confounding                                                                                                                        | P 7     |
|                              |         | (b) Describe any methods used to examine subgroups and interactions                                                                                                                                          | P 7     |
|                              |         | (c) Explain how missing data were addressed                                                                                                                                                                  | P 7     |
|                              |         | (d) If applicable, describe analytical methods taking account of sampling strategy                                                                                                                           | NA      |
|                              |         | (e) Describe any sensitivity analyses                                                                                                                                                                        | NA      |
| <b>Results</b>               |         |                                                                                                                                                                                                              |         |
| Participants                 | 13*     | (a) Report numbers of individuals at each stage of study—eg numbers potentially eligible, examined for eligibility, confirmed eligible, included in the study, completing follow-up, and analysed            | P 7-8   |
|                              |         | (b) Give reasons for non-participation at each stage                                                                                                                                                         | P 8     |
|                              |         | (c) Consider use of a flow diagram                                                                                                                                                                           | NA      |
| Descriptive data             | 14*     | (a) Give characteristics of study participants (eg demographic, clinical, social) and information on exposures and potential confounders                                                                     | P 7-9   |
|                              |         | (b) Indicate number of participants with missing data for each variable of interest                                                                                                                          | NA      |
| Outcome data                 | 15*     | Report numbers of outcome events or summary measures                                                                                                                                                         | P 8     |
| Main results                 | 16      | (a) Give unadjusted estimates and, if applicable, confounder-adjusted estimates and their precision (eg, 95% confidence interval). Make clear which confounders were adjusted for and why they were included | P 8, 10 |

|                          |    |                                                                                                                                                                            |         |
|--------------------------|----|----------------------------------------------------------------------------------------------------------------------------------------------------------------------------|---------|
|                          |    | (b) Report category boundaries when continuous variables were categorized                                                                                                  | P 9-10  |
|                          |    | (c) If relevant, consider translating estimates of relative risk into absolute risk for a meaningful time period                                                           | NA      |
| Other analyses           | 17 | Report other analyses done—eg analyses of subgroups and interactions, and sensitivity analyses                                                                             | NA      |
| <b>Discussion</b>        |    |                                                                                                                                                                            |         |
| Key results              | 18 | Summarise key results with reference to study objectives                                                                                                                   | P 10-11 |
| Limitations              | 19 | Discuss limitations of the study, taking into account sources of potential bias or imprecision. Discuss both direction and magnitude of any potential bias                 | P 13    |
| Interpretation           | 20 | Give a cautious overall interpretation of results considering objectives, limitations, multiplicity of analyses, results from similar studies, and other relevant evidence | P 11-13 |
| Generalisability         | 21 | Discuss the generalisability (external validity) of the study results                                                                                                      | P 13    |
| <b>Other information</b> |    |                                                                                                                                                                            |         |
| Funding                  | 22 | Give the source of funding and the role of the funders for the present study and, if applicable, for the original study on which the present article is based              | P 13    |

\*Give information separately for exposed and unexposed groups.

**Note:** An Explanation and Elaboration article discusses each checklist item and gives methodological background and published examples of transparent reporting. The STROBE checklist is best used in conjunction with this article (freely available on the Web sites of PLoS Medicine at <http://www.plosmedicine.org/>, Annals of Internal Medicine at <http://www.annals.org/>, and Epidemiology at <http://www.epidem.com/>). Information on the STROBE Initiative is available at [www.strobe-statement.org](http://www.strobe-statement.org).
